# Supplementary material for: Chemical shift prediction of RNA imino groups: application toward characterizing RNA excited states
Source: PubMed Central journal article supplement (PMC7952389; doi:10.1038/s41467-021-21840-x), 2021-03-11
Supplement: 41467_2021_21840_MOESM1_ESM.pdf [file 41467_2021_21840_MOESM1_ESM.pdf]

# Supplementary Information

## Chemical Shift Prediction of RNA Imino Groups: Application toward Characterizing RNA Excited States

Yanjiao Wang,<sup>1</sup> Ge Han,<sup>1</sup> Xiuying Jiang,<sup>1</sup> Tairan Yuwen,<sup>2</sup> Yi Xue\*<sup>1</sup>

<sup>1</sup> School of Life Sciences; Tsinghua-Peking Joint Center for Life Sciences; Beijing Advanced Innovation Center for Structural Biology, Tsinghua University, Beijing, 100084, China

<sup>2</sup> Department of Pharmaceutical Analysis & State Key Laboratory of Natural and Biomimetic Drugs, School of Pharmaceutical Sciences, Peking University, Beijing 100191, China

### Table of Contents

|                                    |           |
|------------------------------------|-----------|
| <b>TABLE OF CONTENTS</b> .....     | <b>1</b>  |
| <b>SUPPLEMENTARY FIGURES</b> ..... | <b>2</b>  |
| FIGURE S1 .....                    | 2         |
| FIGURE S2 .....                    | 3         |
| FIGURE S3 .....                    | 4         |
| FIGURE S4 .....                    | 5         |
| FIGURE S5 .....                    | 6         |
| FIGURE S6 .....                    | 7         |
| FIGURE S7 .....                    | 8         |
| FIGURE S8 .....                    | 9         |
| FIGURE S9 .....                    | 39        |
| FIGURE S10 .....                   | 40        |
| FIGURE S11 .....                   | 41        |
| FIGURE S12 .....                   | 42        |
| FIGURE S13 .....                   | 43        |
| FIGURE S14 .....                   | 44        |
| FIGURE S15 .....                   | 45        |
| <b>SUPPLEMENTARY TABLES</b> .....  | <b>46</b> |
| TABLE S1 .....                     | 46        |
| TABLE S2 .....                     | 47        |
| TABLE S3 .....                     | 49        |
| TABLE S4 .....                     | 50        |
| TABLE S5 .....                     | 50        |
| TABLE S6 .....                     | 51        |
| TABLE S7 .....                     | 52        |
| TABLE S8 .....                     | 53        |
| TABLE S9 .....                     | 53        |

## Supplementary Figures

**Figure S1.** The  $^1\text{H}^{\text{N}}\text{-}^{15}\text{N}$  resonance distributions of BP-triplets with the most occurrences in the training dataset. The BP-triplet name is shown in the top-left corner of each box. The left number in the bracket indicates the total occurrence of the specific BP-triplet, and the right number is the same except that the BP-triplets flanked by the same base pairs are counted only once. In each box, most resonances cluster very well around an average position, while those discrete ones are outliers that will be trimmed according to the three-sigma rule.

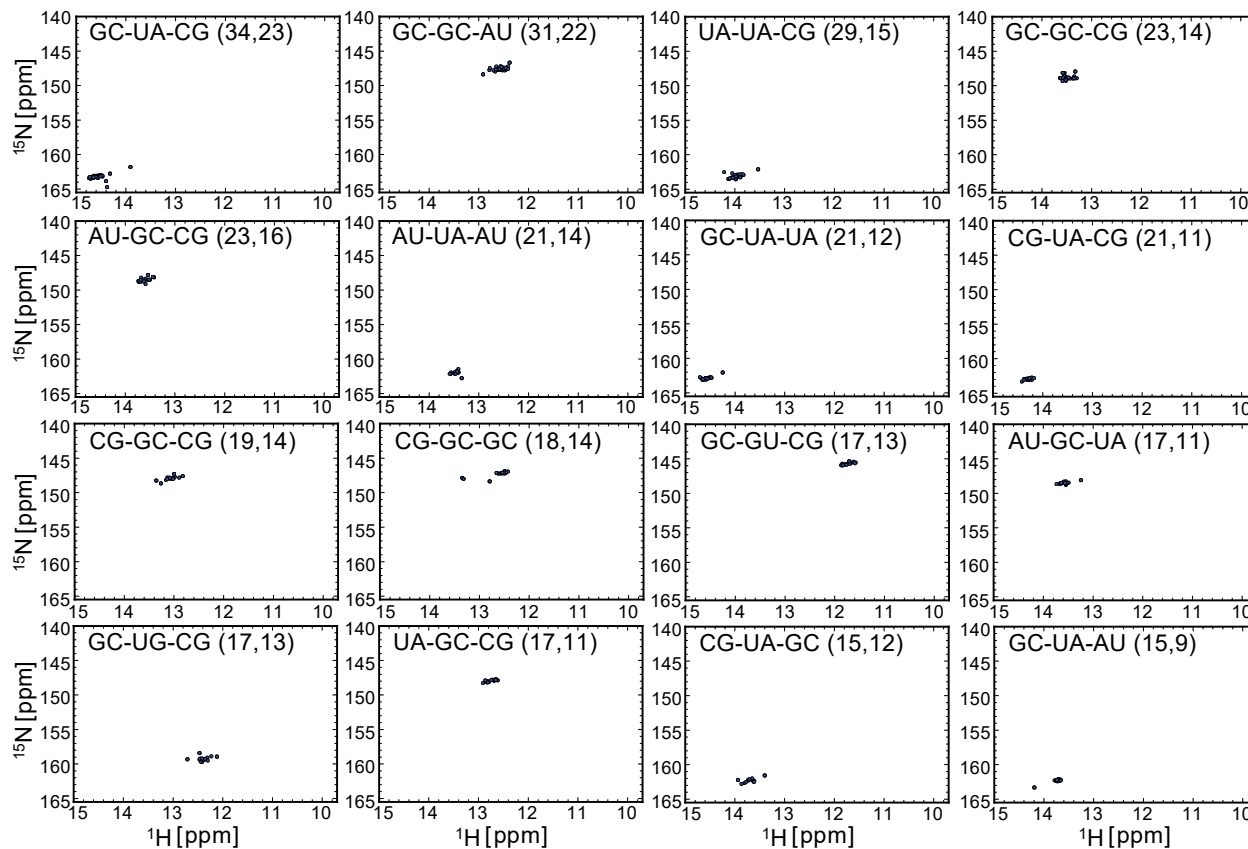

**Figure S2.** Correlation between LARMOR<sup>D</sup> predicted and experimental chemical shifts for <sup>15</sup>N (left) and <sup>1</sup>H<sup>N</sup> (right) in the training dataset (a) and the testing dataset (b).

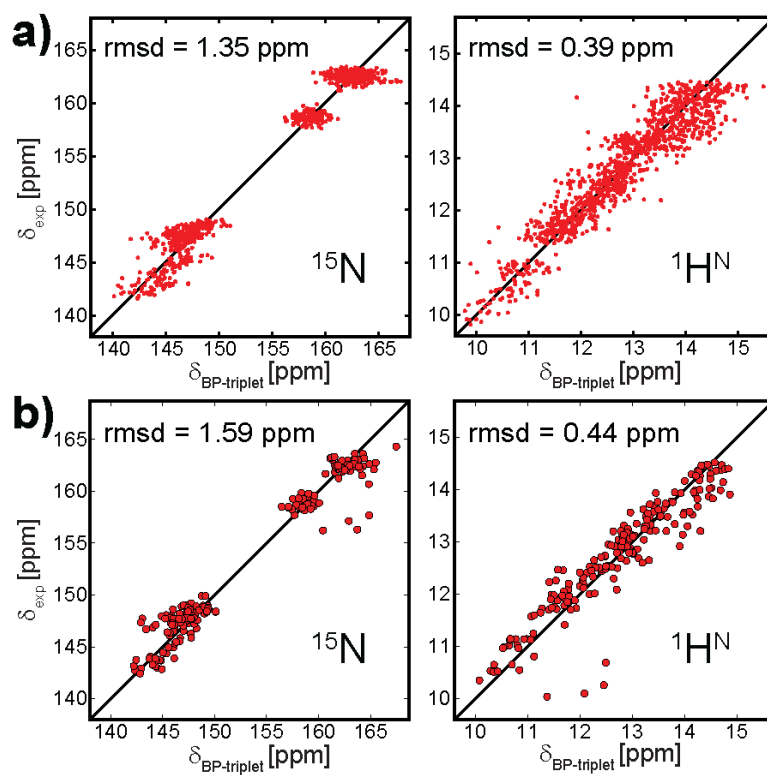

**Figure S3.** Correlation between chemical shifts measured at 10 °C and 25 °C. The chemical shift data were collected by measuring  $^1\text{H}$ - $^{15}\text{N}$  2D spectra at 10 °C and 25 °C for nine hairpin samples (HP17, HP19, HP20, HP22, HP23, HP24, HP25, HP26 and HP28). The offset is shown by a dashed line along the data points. After re-referencing, the rmsd values for  $^{15}\text{N}$  and  $^1\text{H}^{\text{N}}$  can be reduced to 0.079 ppm and 0.029 ppm, respectively.

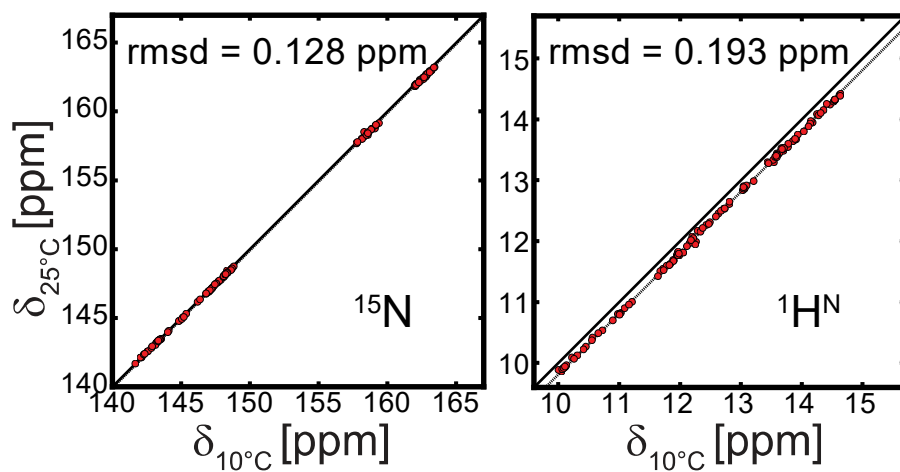

**Figure S4.** Enlarged imino chemical shift maps of BP-triplets (i.e., Fig. 2). The chemical shift distributions of BP-triplets with different central base pairs are displayed in four subplots, respectively. In each subplot, the average imino resonance of each BP-triplet is marked on the map. The error bars represent one standard deviation (s.d.) (the corresponding sample sizes are provided in Supplementary Table 2). Each BP-triplet is described as a triplet code: the middle code denotes the central base pair of interest; the first code and the last code are 5' and 3' neighbouring base pairs, and are represented by corresponding colors and shapes, respectively.

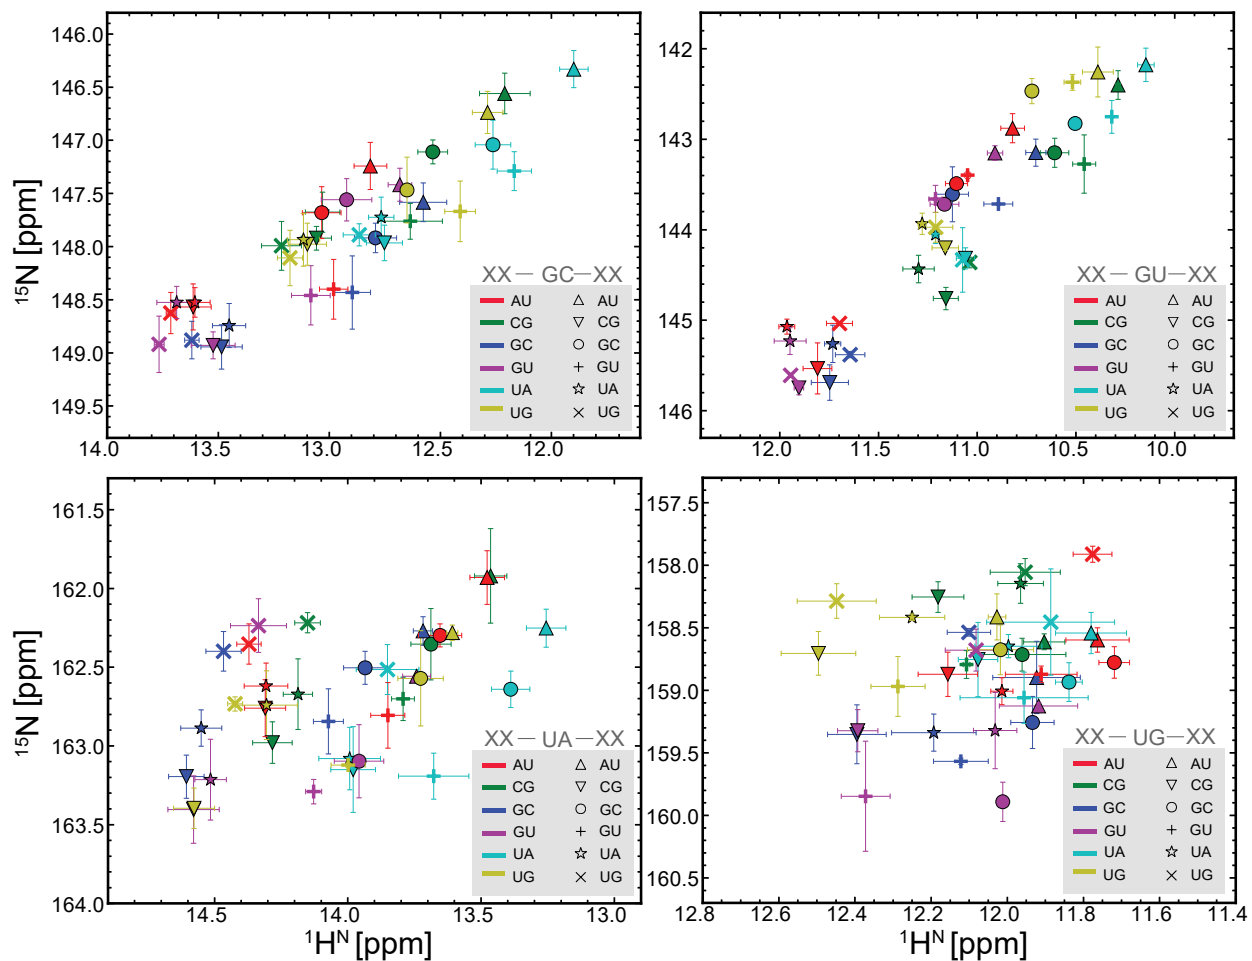

**Figure S5.** RC and EF shifts calculated by the semi-empirical model using structures built by RNAComposer. The DC parameter set (see the main text) is used here. Chemical shift data of various BP-triplets are divided into four groups according to the central base pairs, as shown in different colors of x-axis labels. For each BP-triplet, RC shift (dark blue) and EF shift (black) are shown side by side.

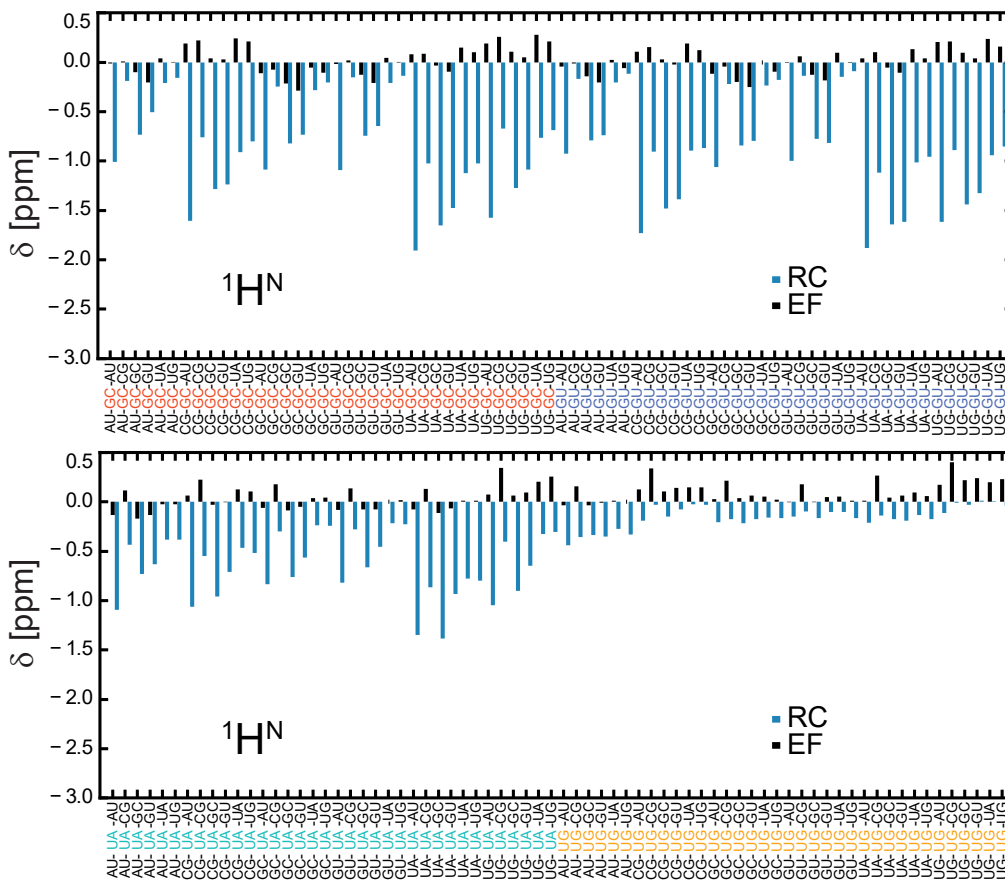

**Figure S6.** Correlation between chemical shifts calculated by the semi-empirical model (including both RC and EF effects) and chemical shifts in BP-triplet lookup table. The structure models were generated by RNAComposer. Chemical shift data in BP-triplet table are divided into four groups (GC: red; GU: blue; UA: cyan; UG: orange) according to the central base pair. The upper four subplots show correlation for  $^{15}\text{N}$ , and the lower four subplots show correlation for  $^1\text{H}^{\text{N}}$ . The semi-empirical calculation was carried out by summing up the intrinsic chemical shifts of the central base pair and RC/EF contributions of two neighbouring base pairs. For each subplot, the intrinsic chemical shift was adjusted so that the semi-empirical result and data from the BP-triplet table give the same mean value.

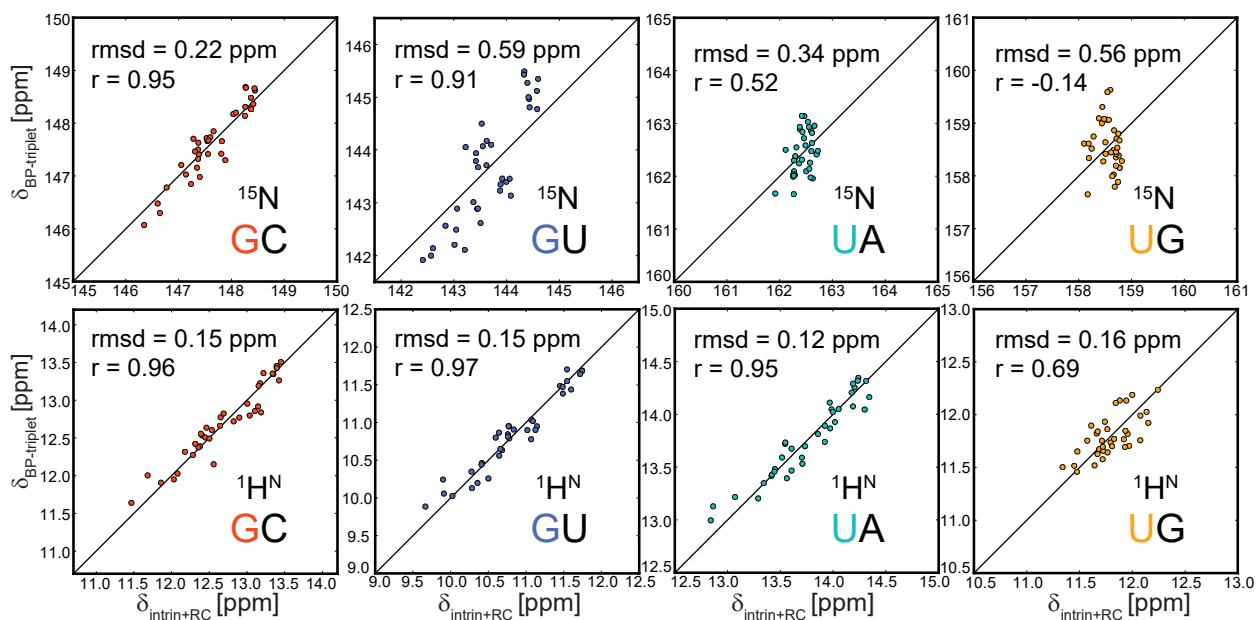

**Figure S7.** Comparison of chemical shifts from semi-empirical calculations and the lookup table. (a) Correlation between chemical shifts calculated by the semi-empirical model using crystal structures and chemical shifts in the BP-triplet lookup table. Note that 108 (instead of 144) different BP-triplets can be found in the crystal structures. (b) Correlation between the average chemical shifts calculated by the semi-empirical model using crystal structures and chemical shifts in the BP-triplet lookup table. The only difference from panel ‘a’ is that the chemical shifts from the same BP-triplet are averaged. (c) Correlation between chemical shifts calculated by the semi-empirical model using structures built by 3DNA and chemical shifts in BP-triplet lookup table. 3DNA structures contain  $4 \times 4 \times 4 = 64$  Watson-Crick BP-triplets. (d) Correlation between chemical shifts calculated by the semi-empirical model using structures built by RNAComposer and chemical shifts in BP-triplet lookup table (same as Fig. 3a, but only 64 WC BP-triplets are presented to make a fair comparison with 3DNA result).

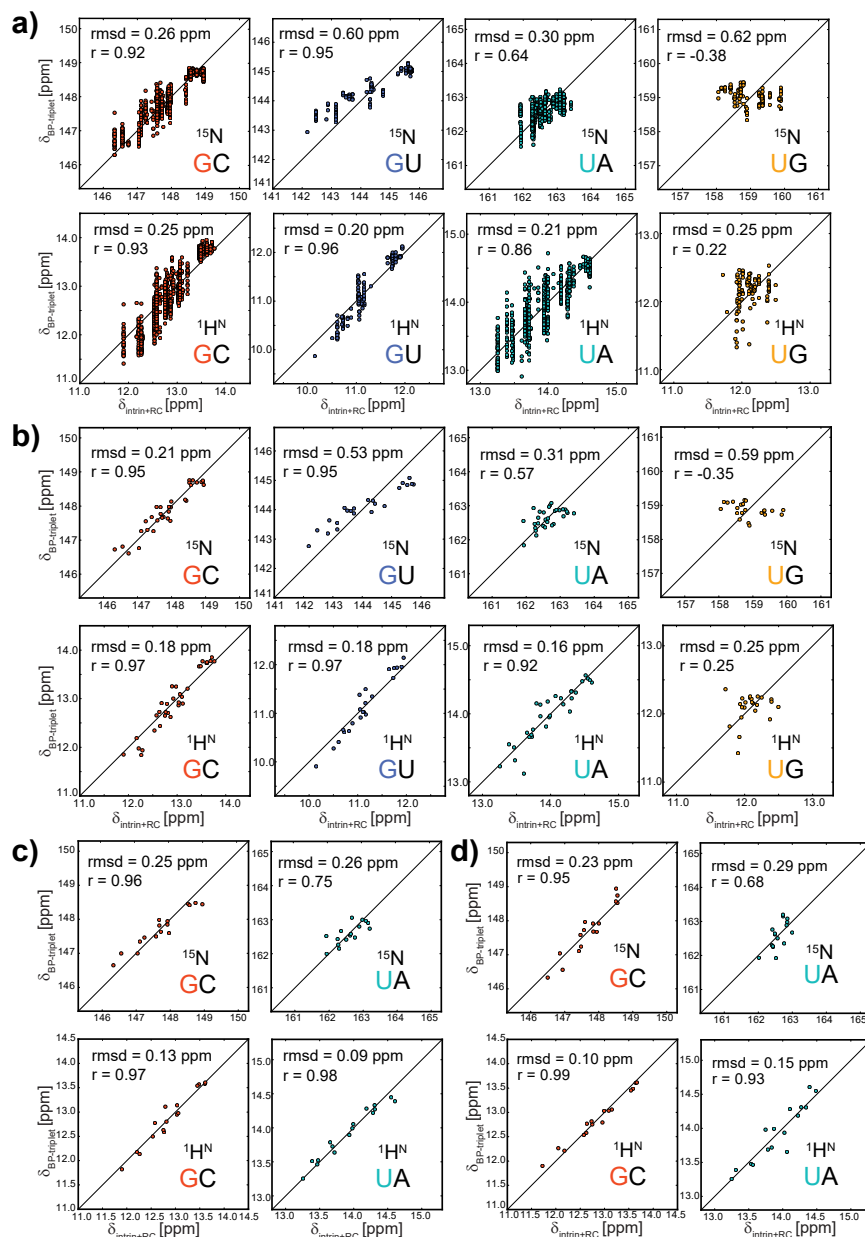



**Figure S8.** Rigid-body parameters for BP-triplets in crystal, RNAComposer and 3DNA structures.

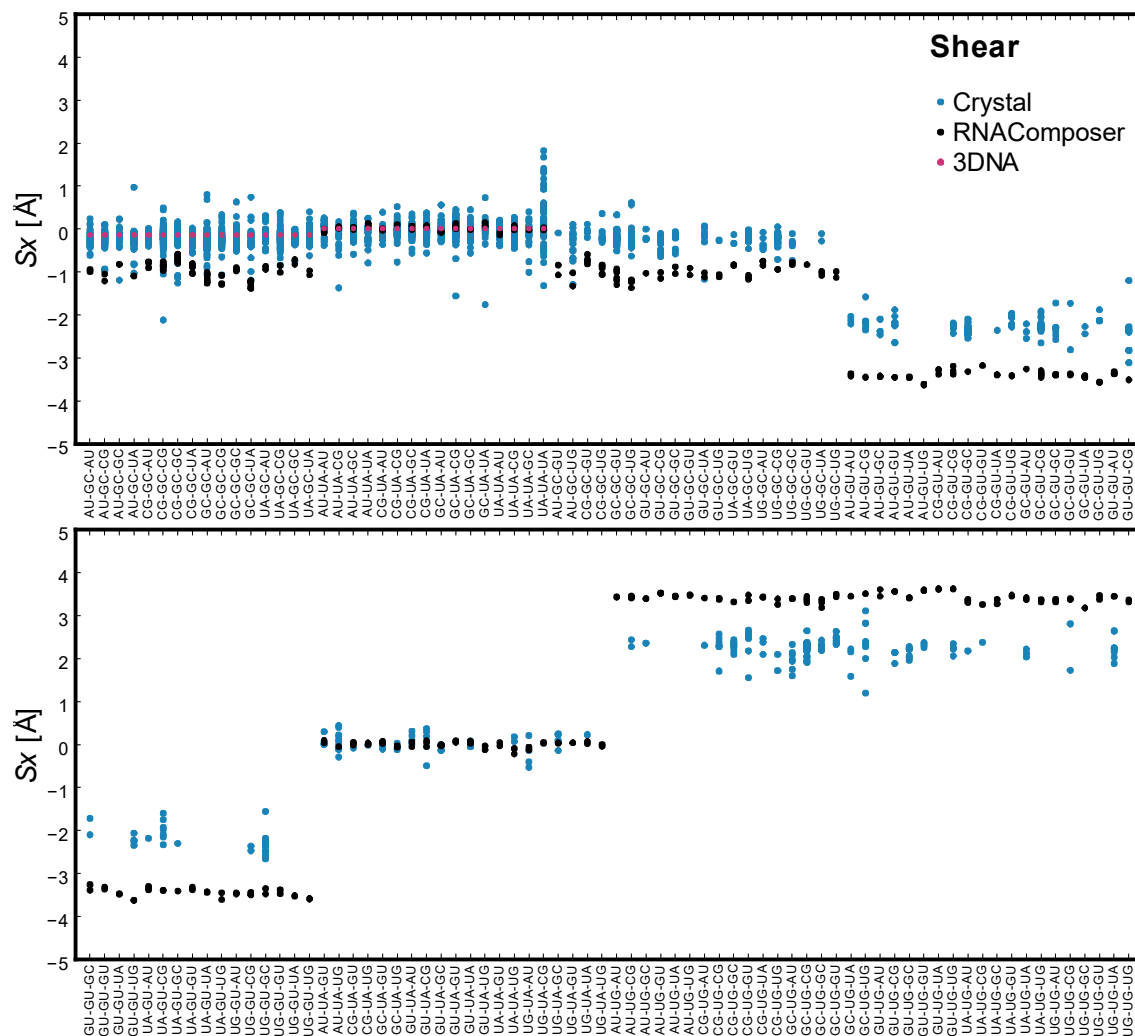

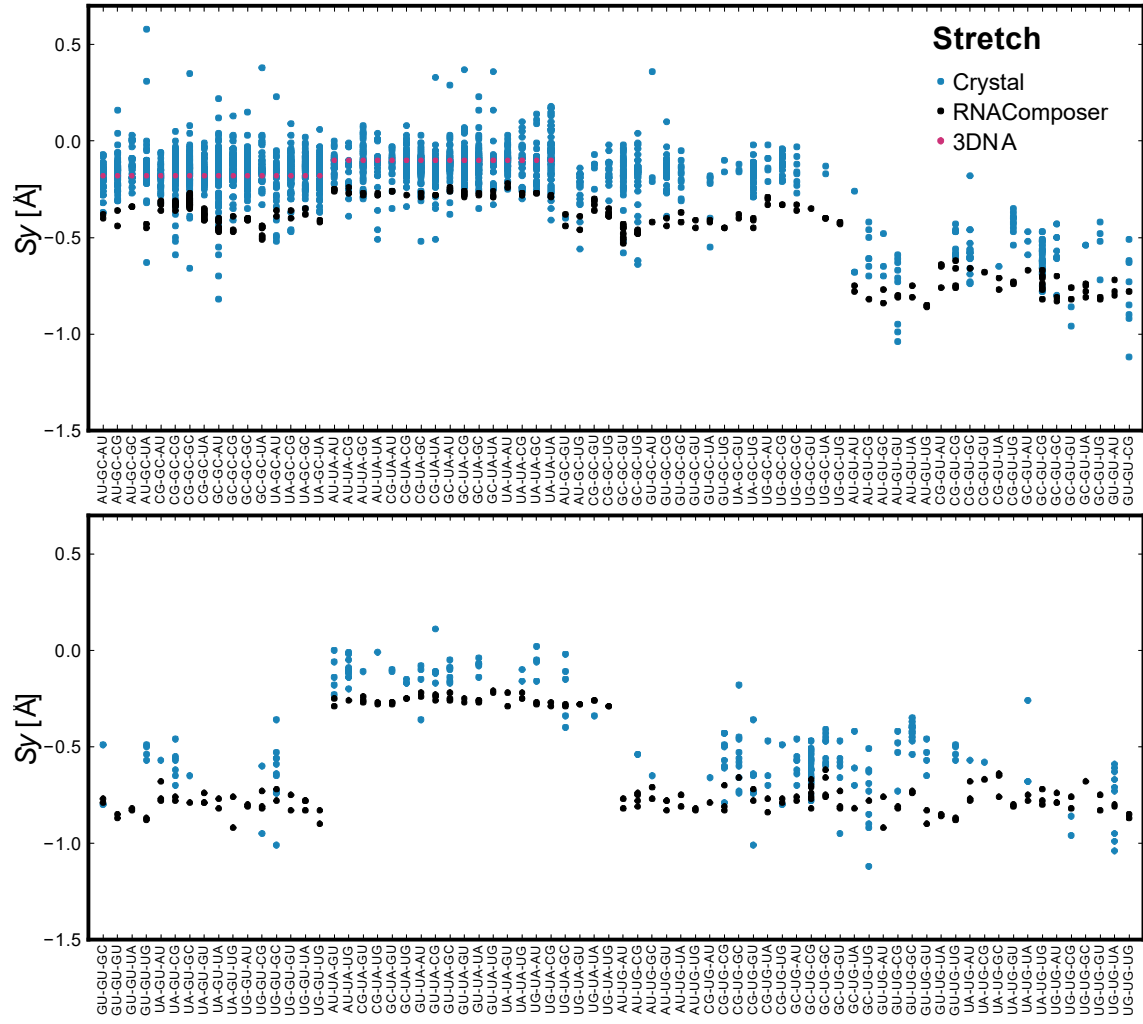



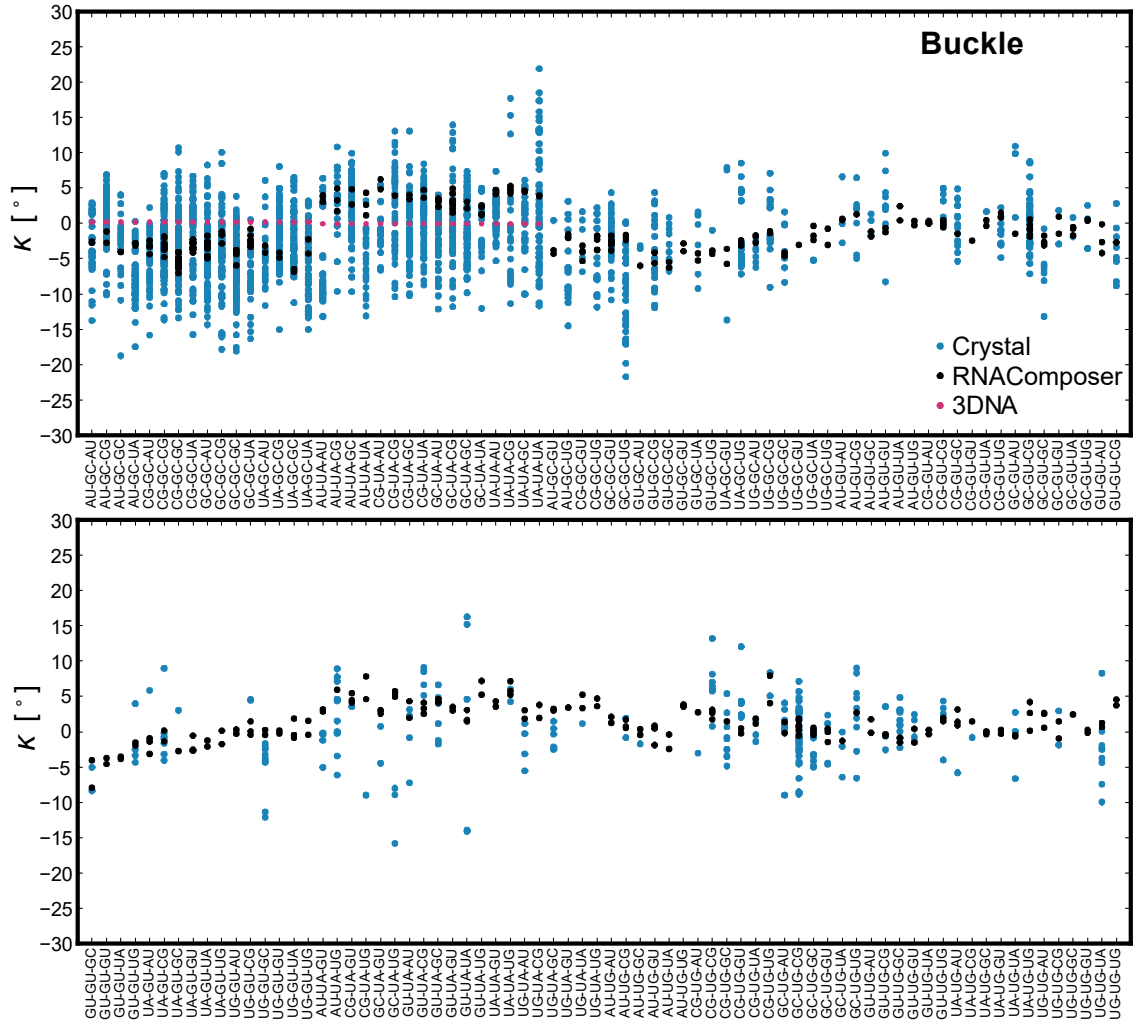



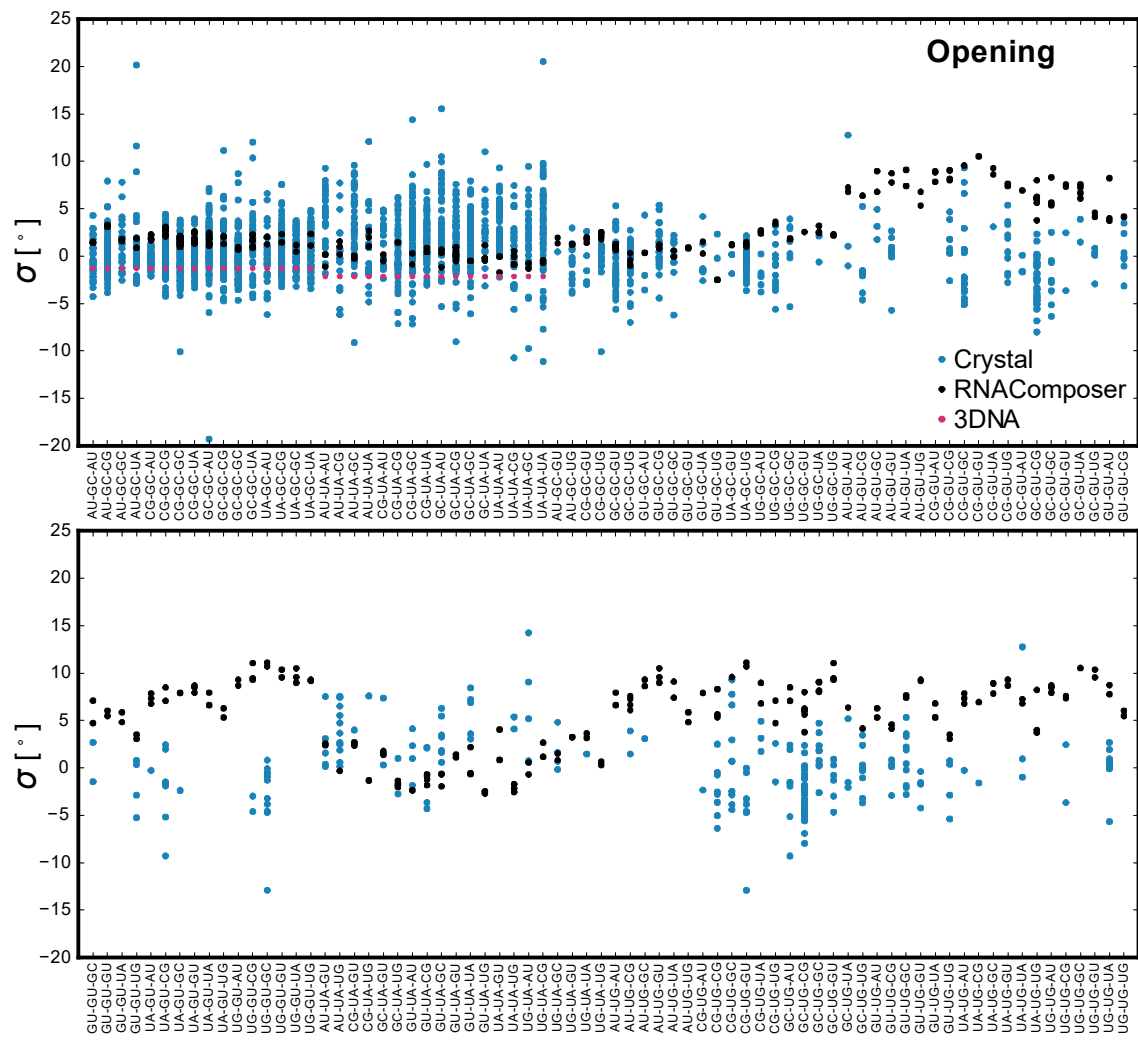

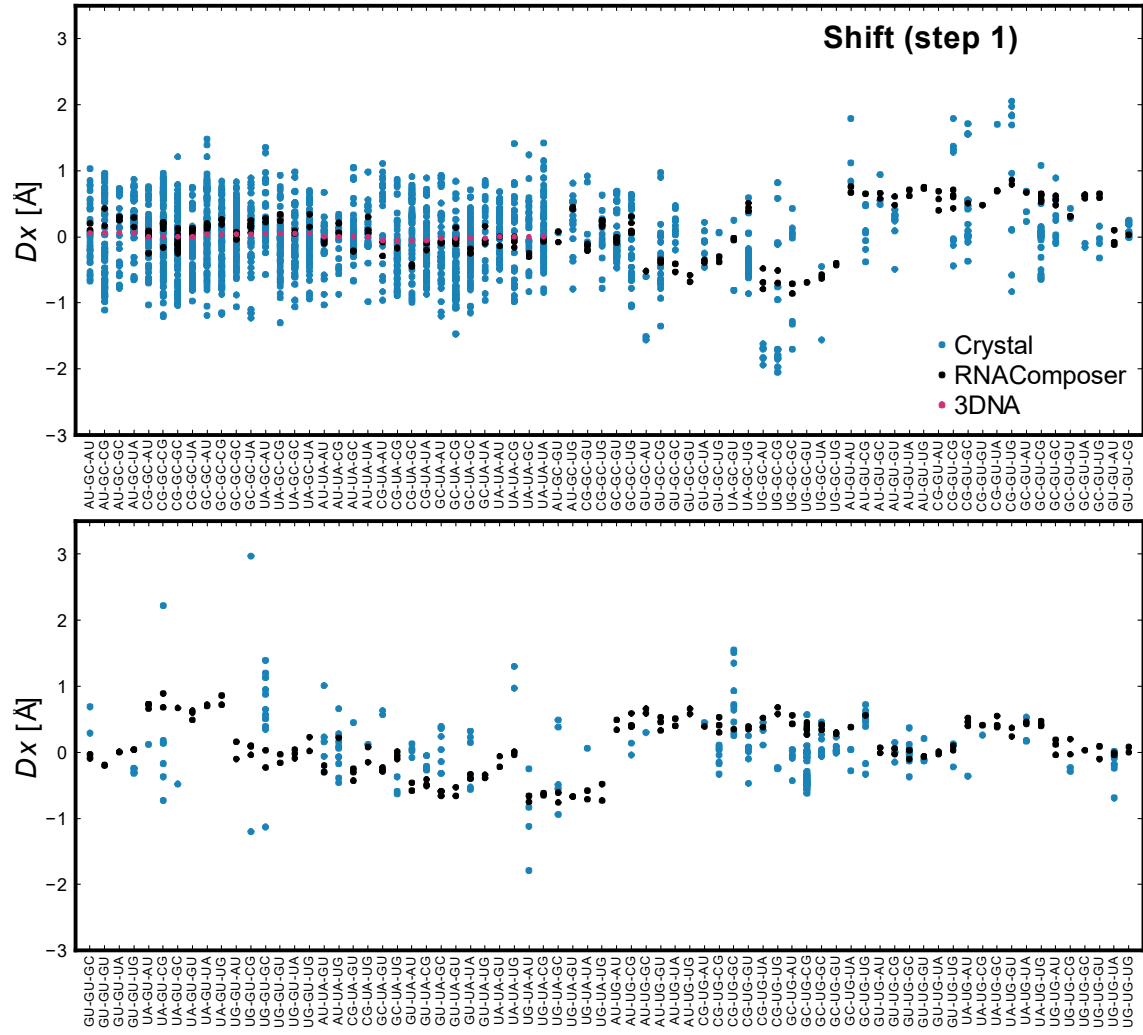

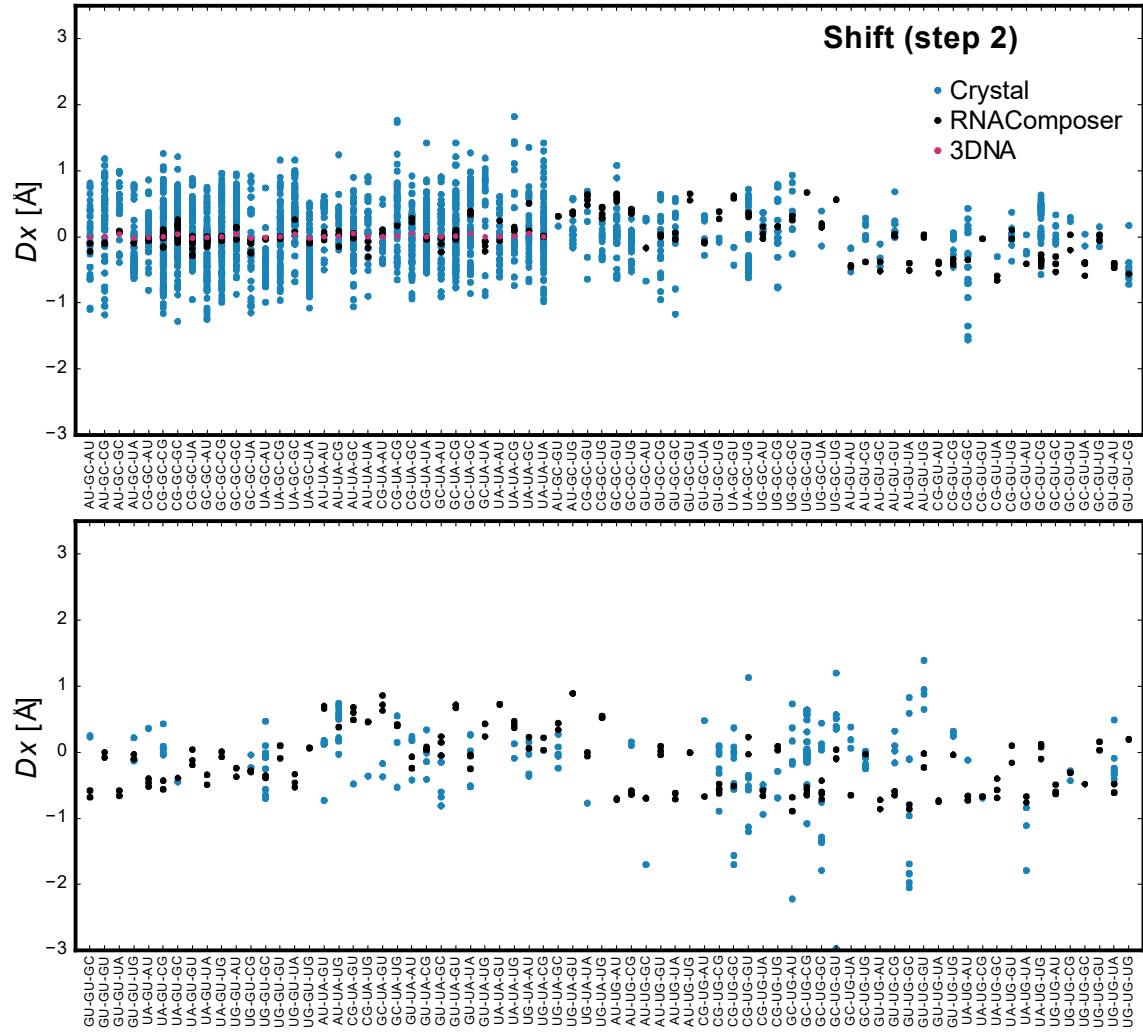





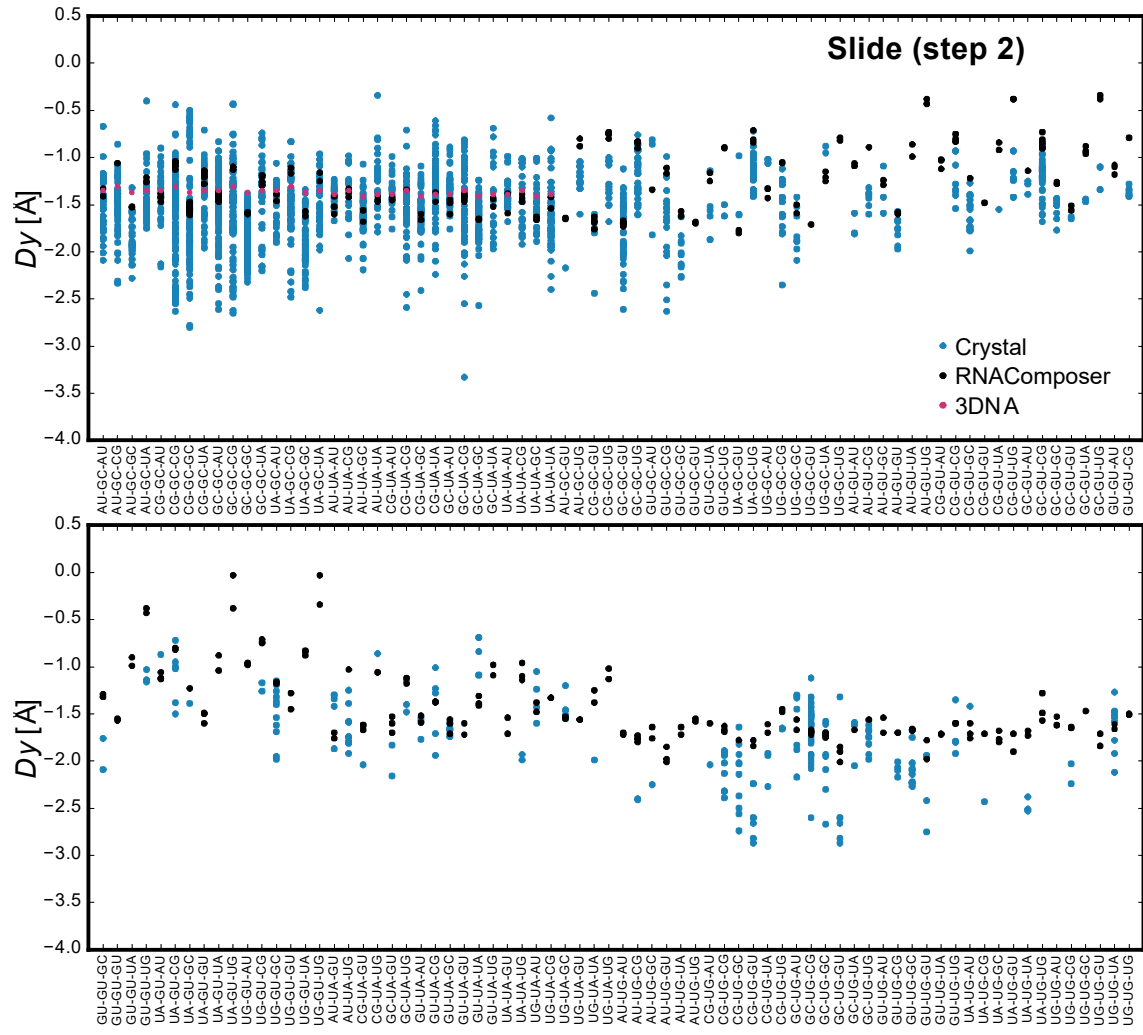

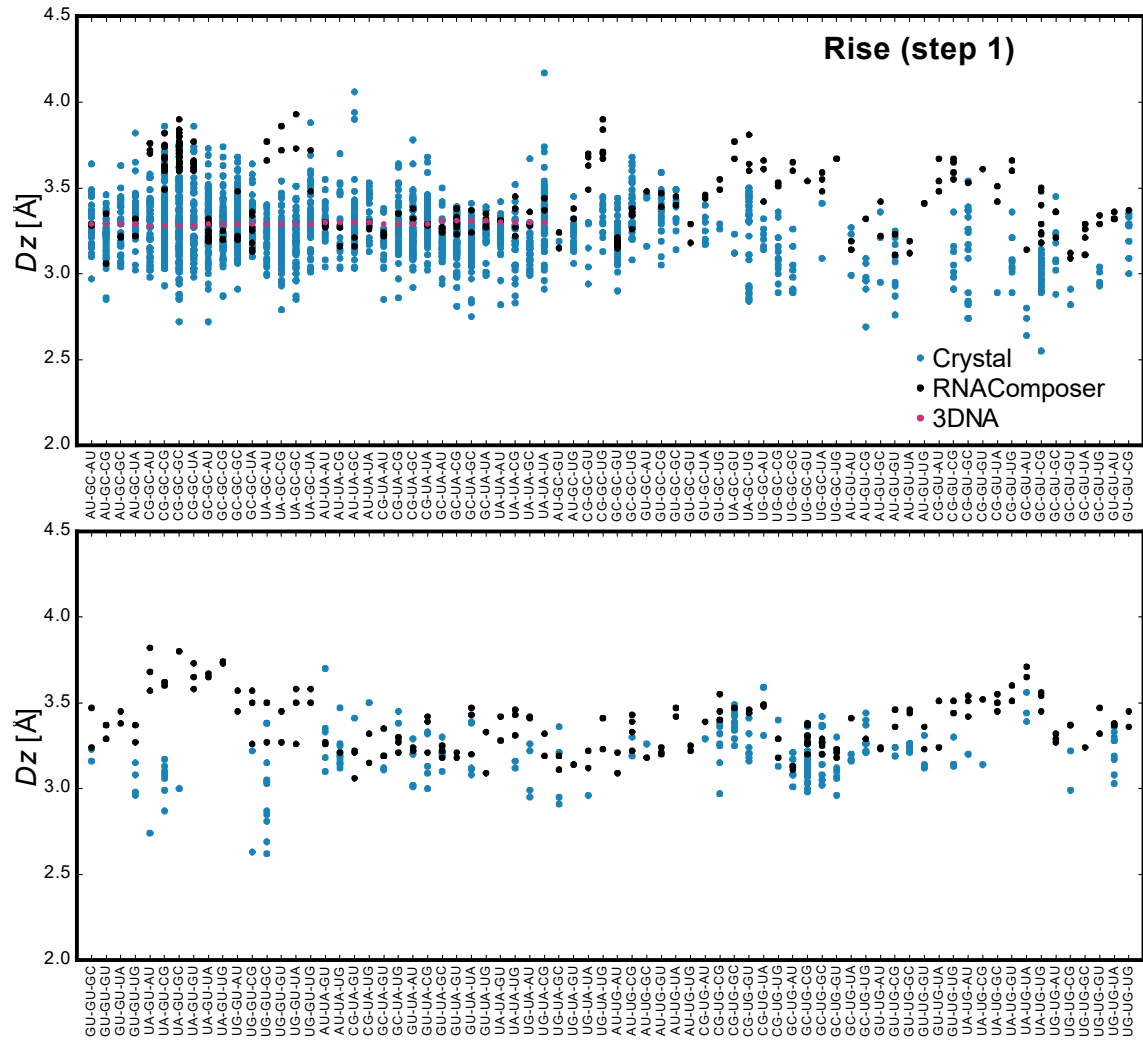

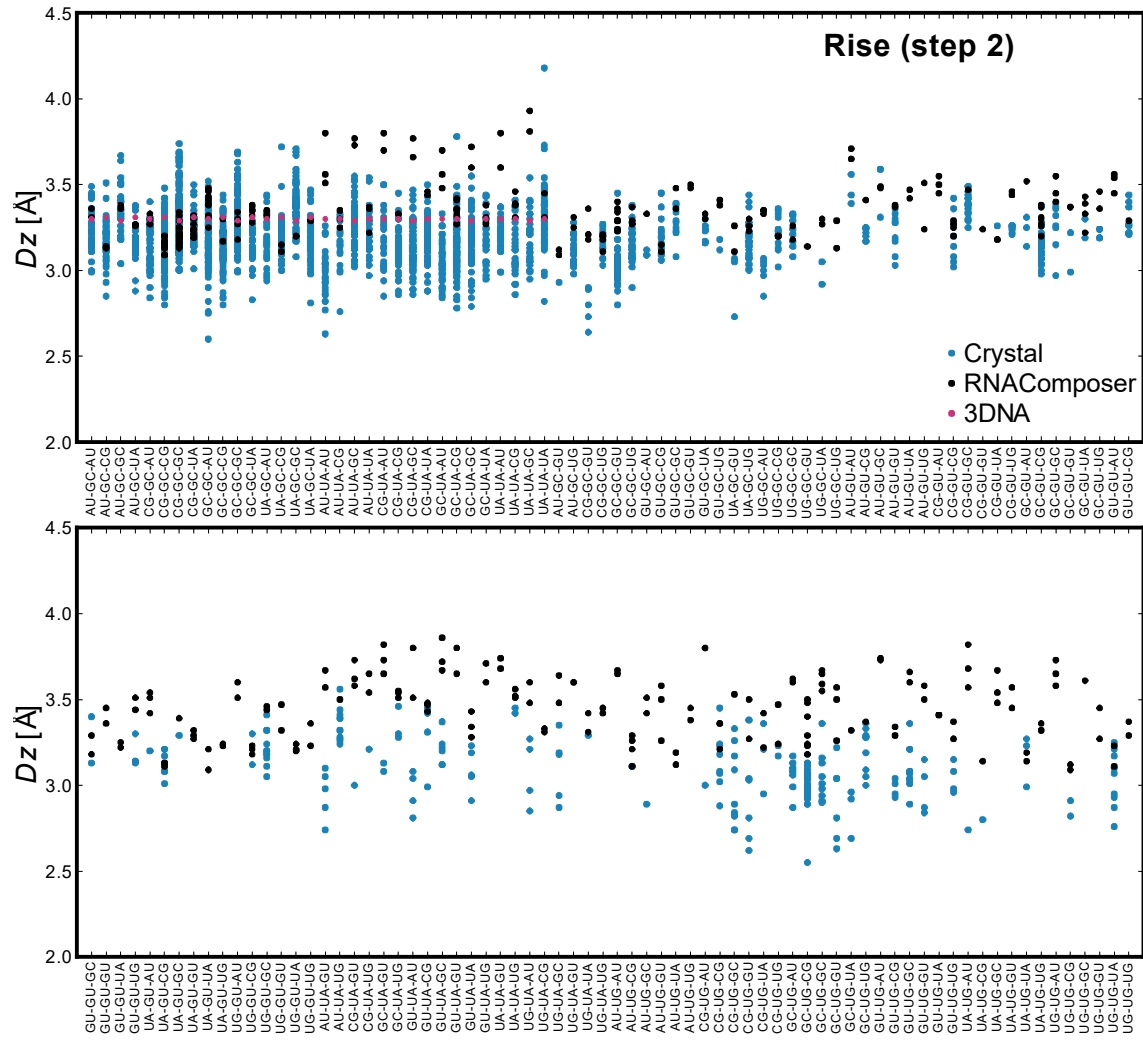

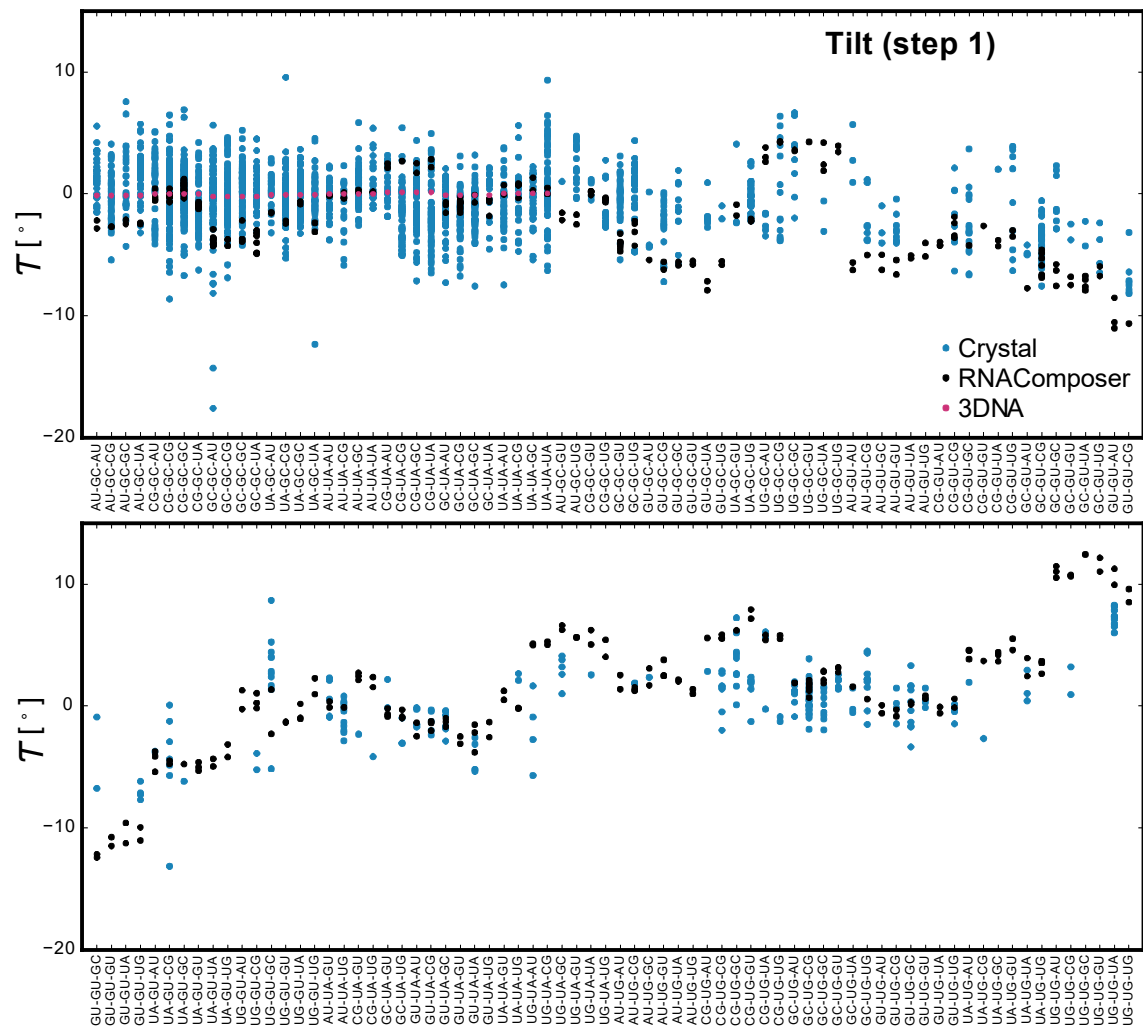











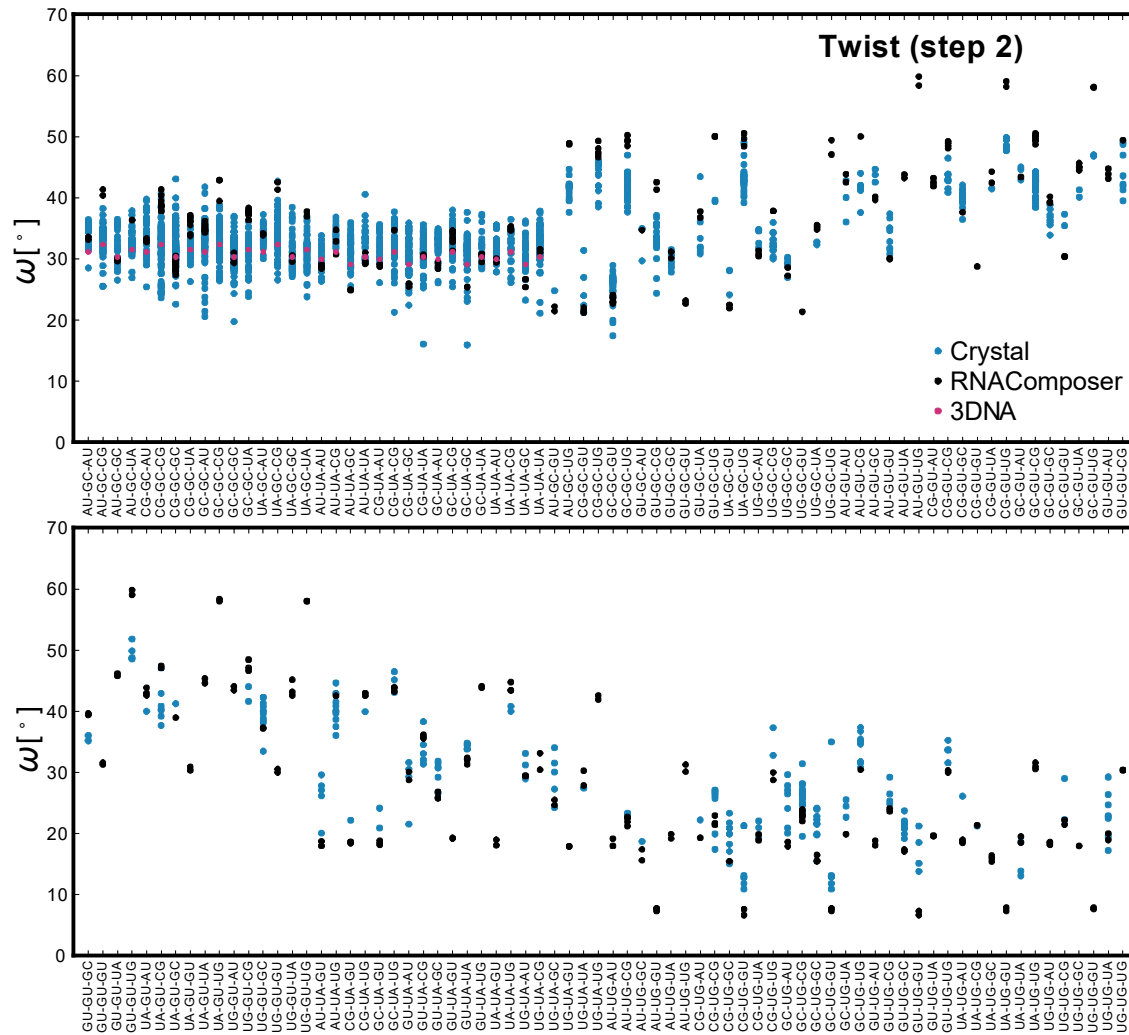

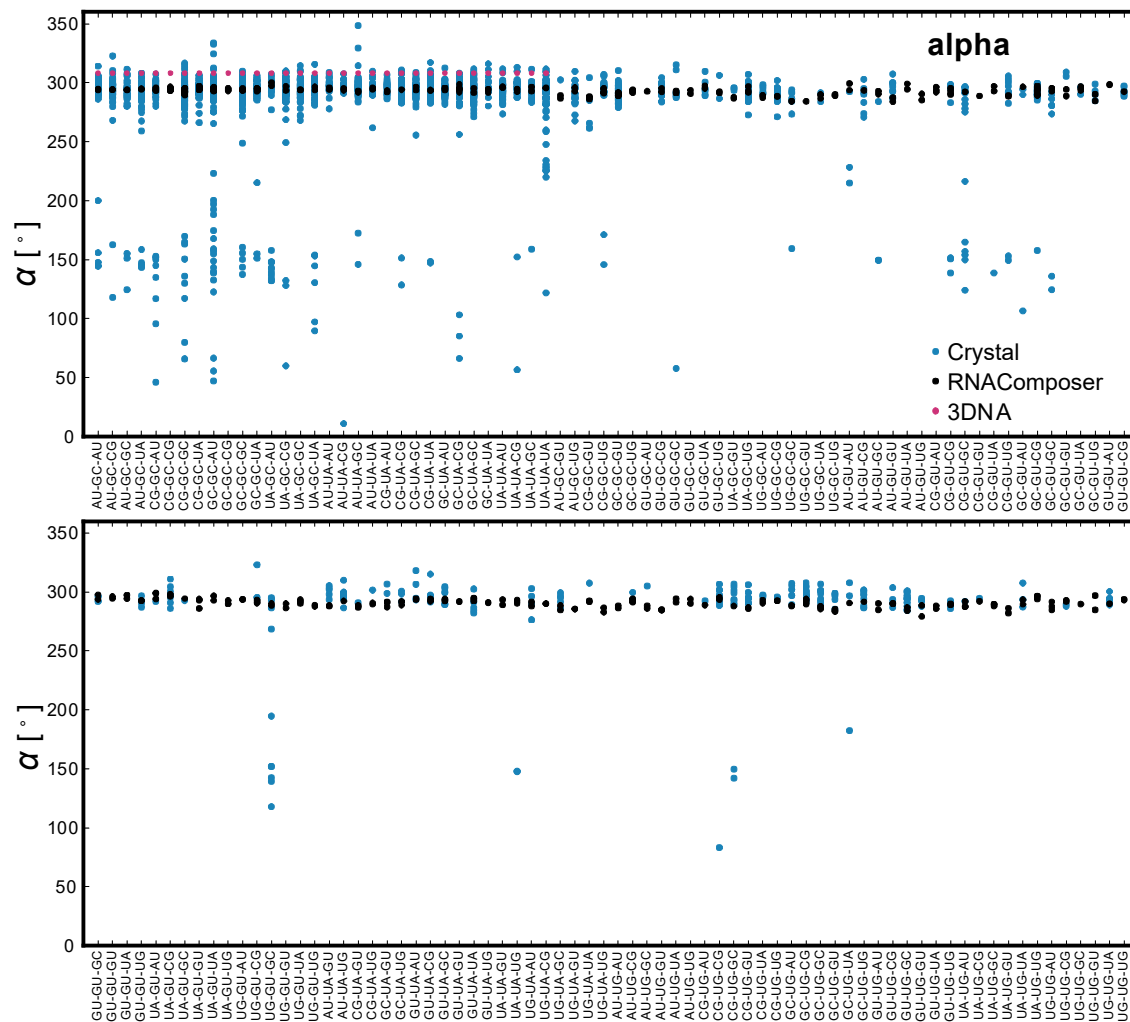







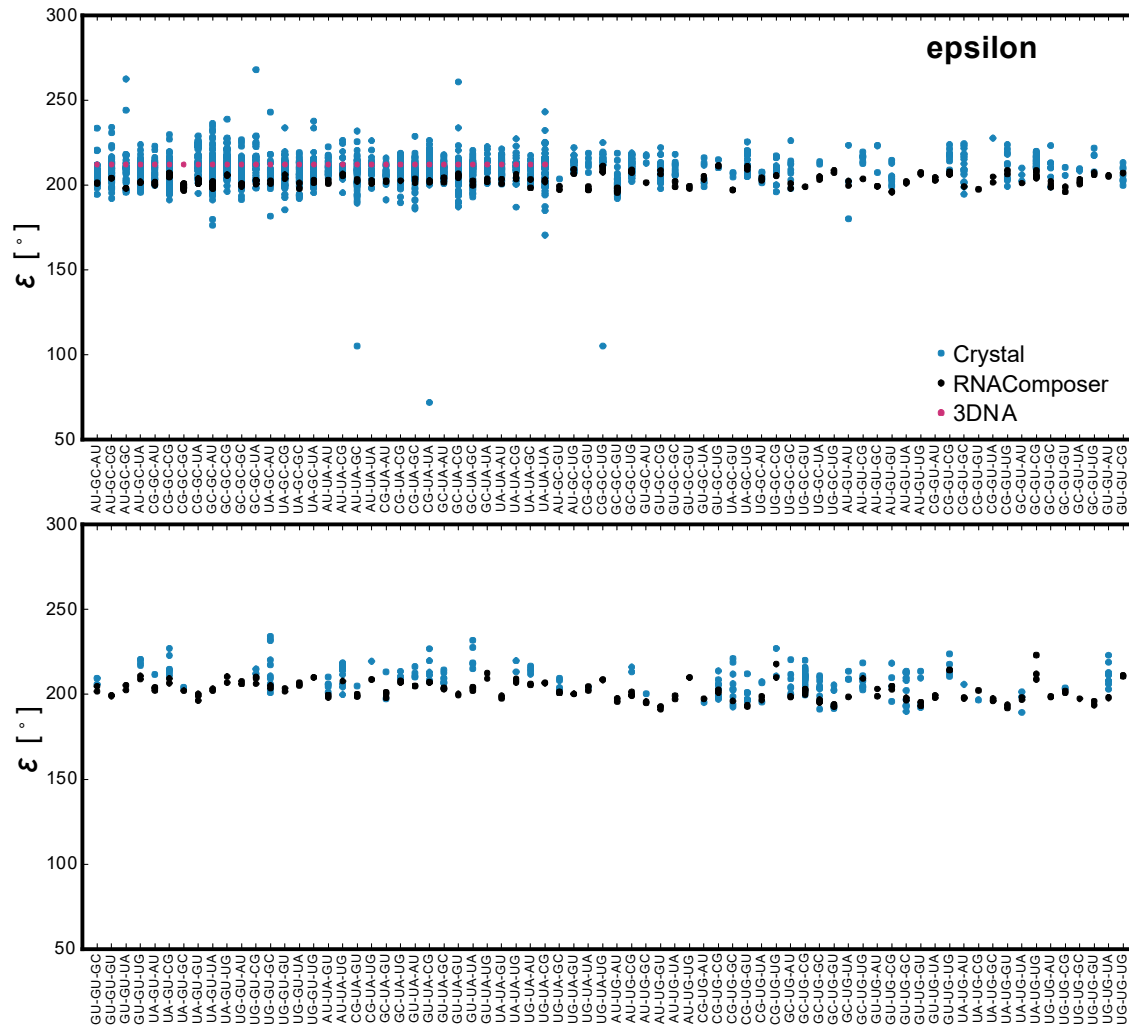

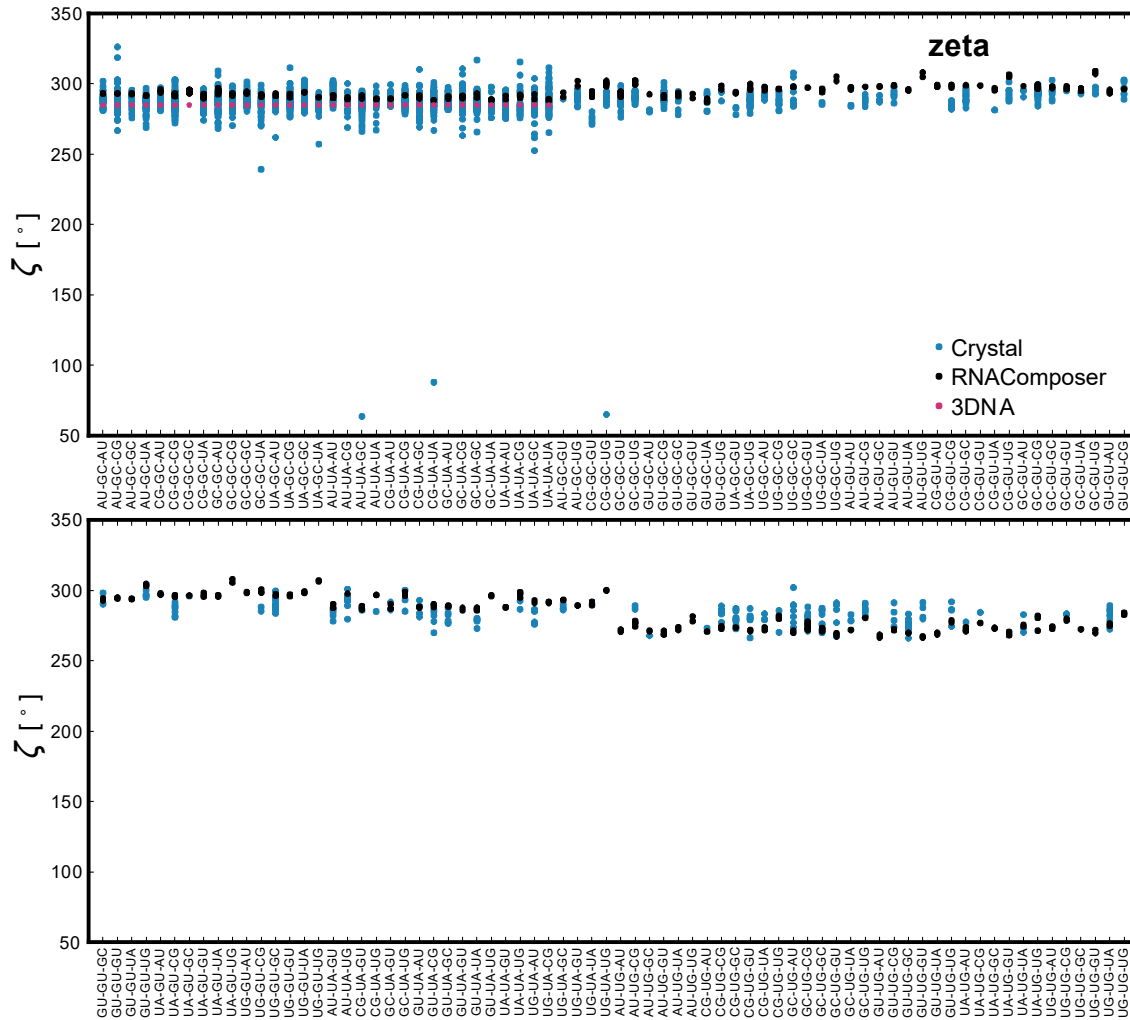







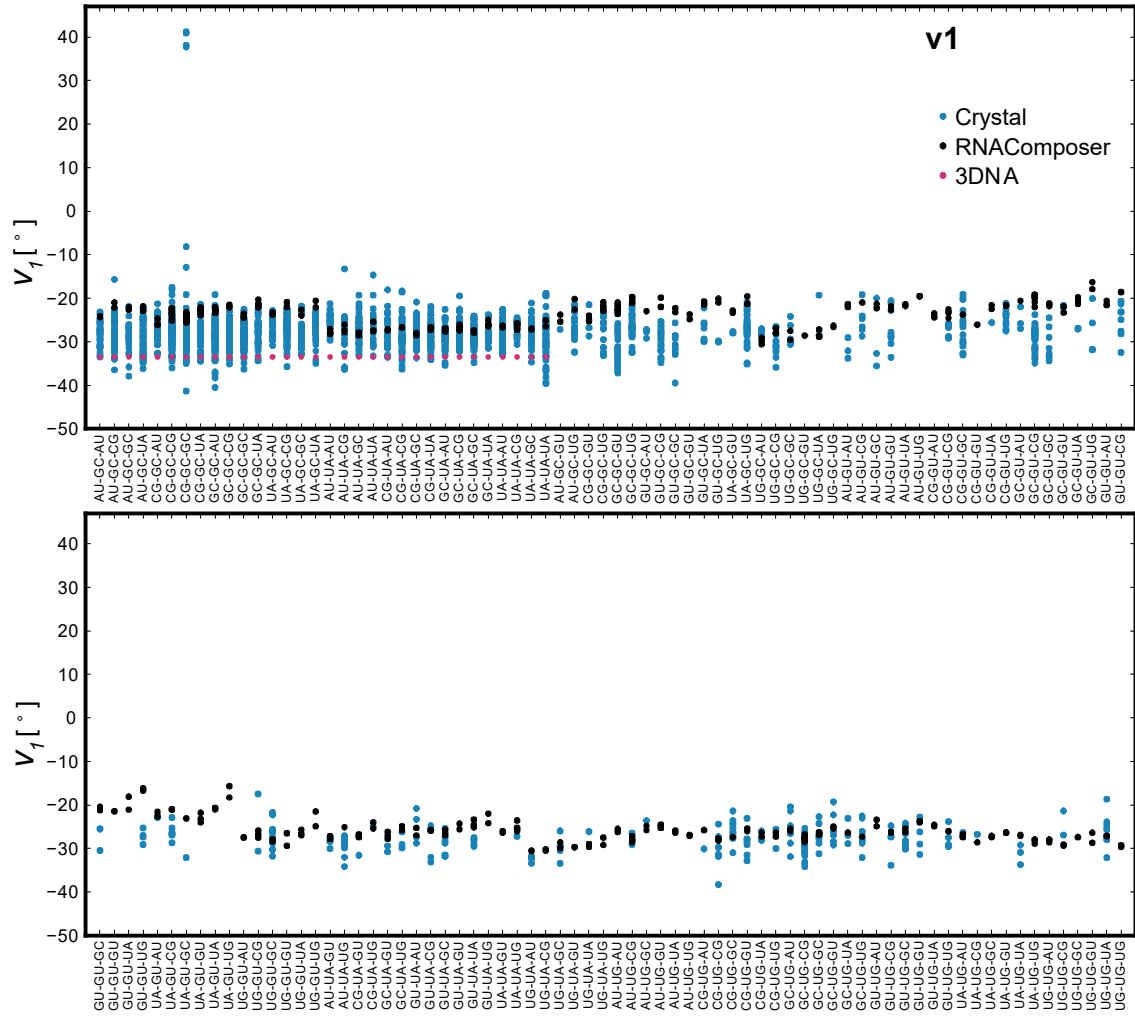

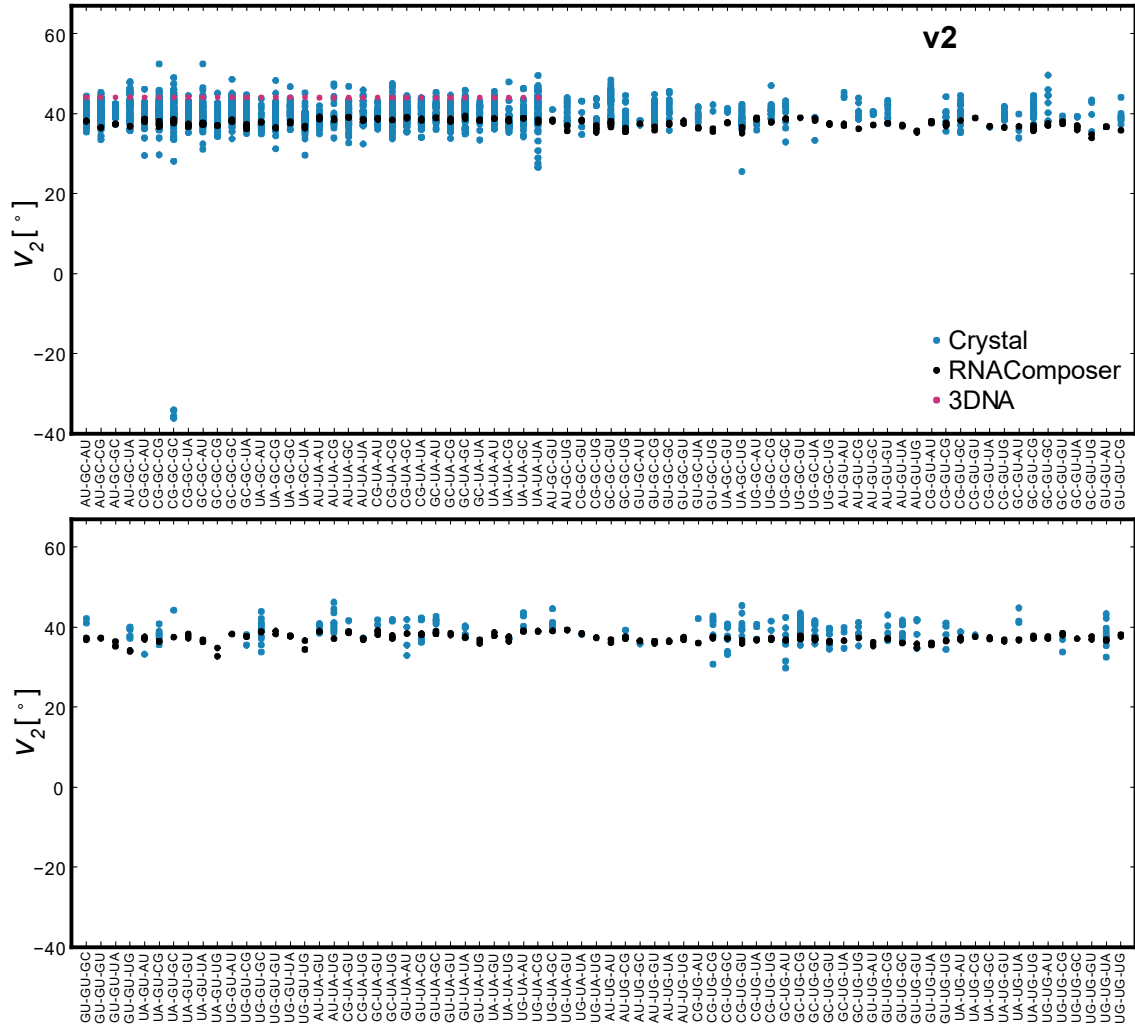



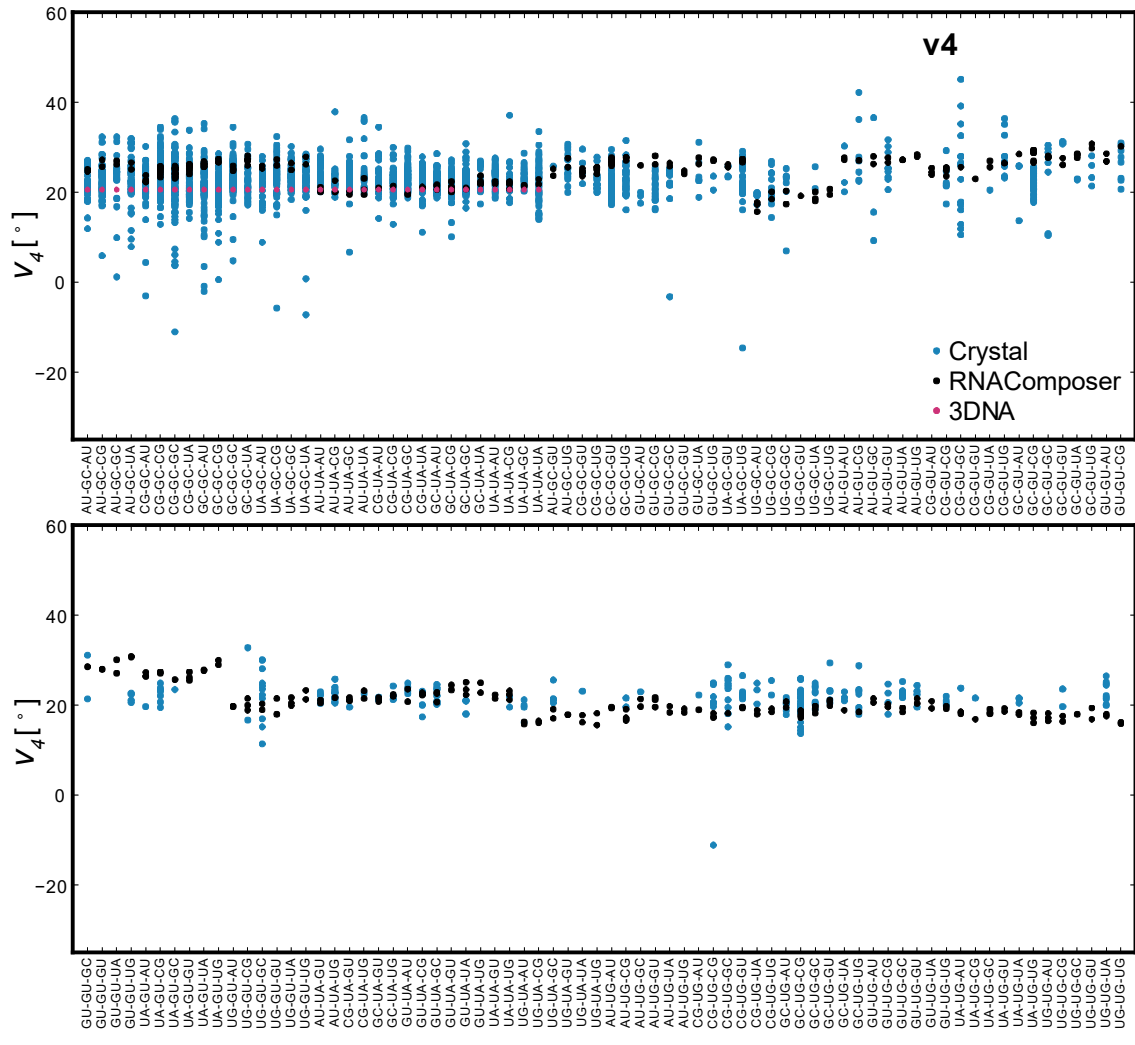

**Figure S9.** RC shifts calculated using 3DNA structures (magenta), RNAComposer structures (black) and crystal structures (dark blue). For each BP-triplet, the  $^{15}\text{N}$  and  $^1\text{H}^{\text{N}}$  chemical shifts are shown in the upper and the lower panels, respectively.

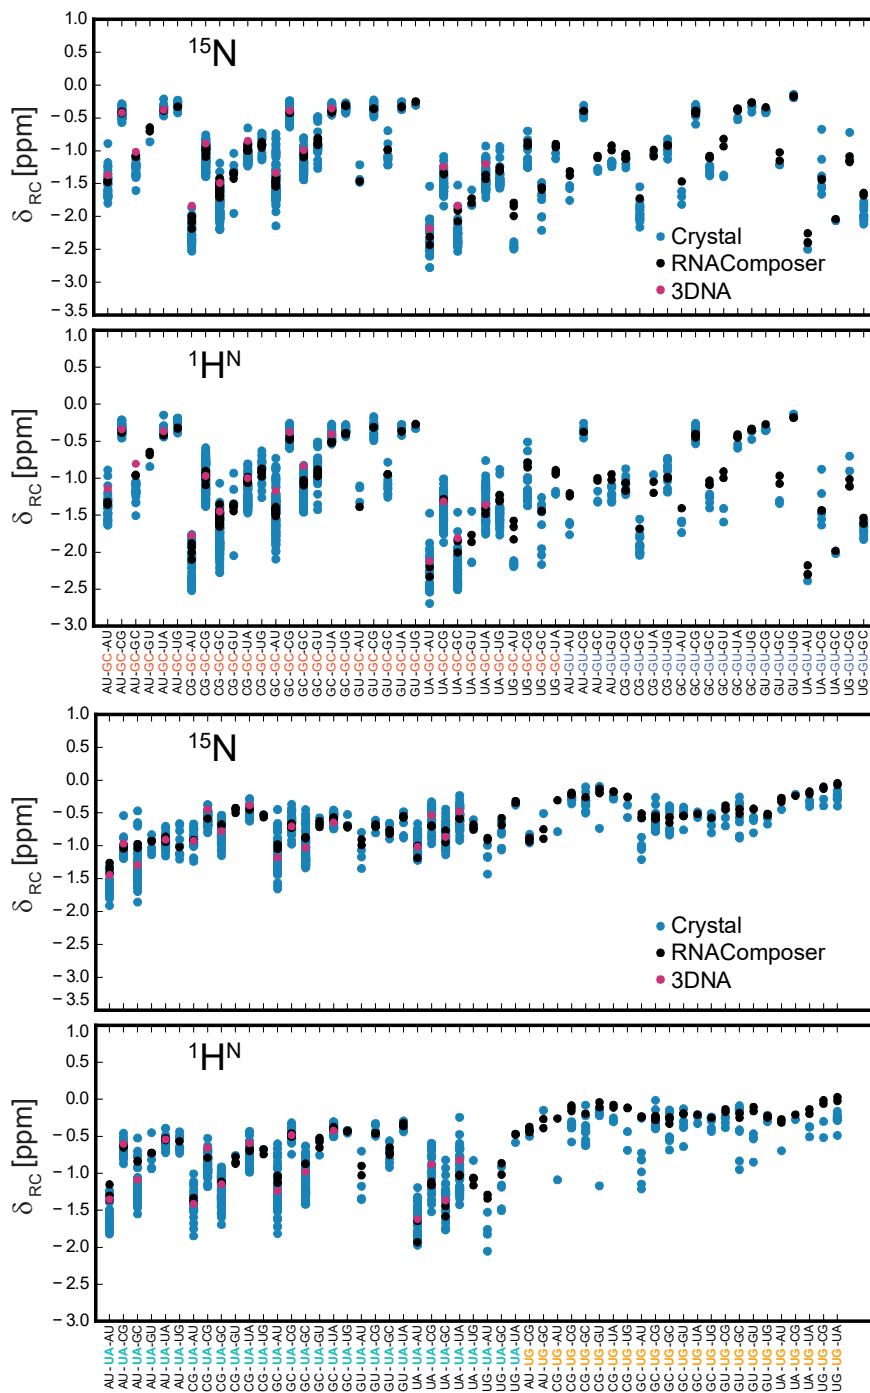

**Figure S10.** The imino chemical shift map produced by the semi-empirical method. (a) Correlation between chemical shifts calculated by RC (calibrated  $^{15}\text{N}$  parameters are used) and BP-triplet chemical shifts for  $^{15}\text{N}$  (upper panel) and  $^1\text{H}^{\text{N}}$  (lower panel). (b) Imino chemical shift map based on calculated RC shifts. The calculated imino resonance of each BP-triplet is shown as a marker on the map. (c) Enlarged view of Imino chemical shift map.

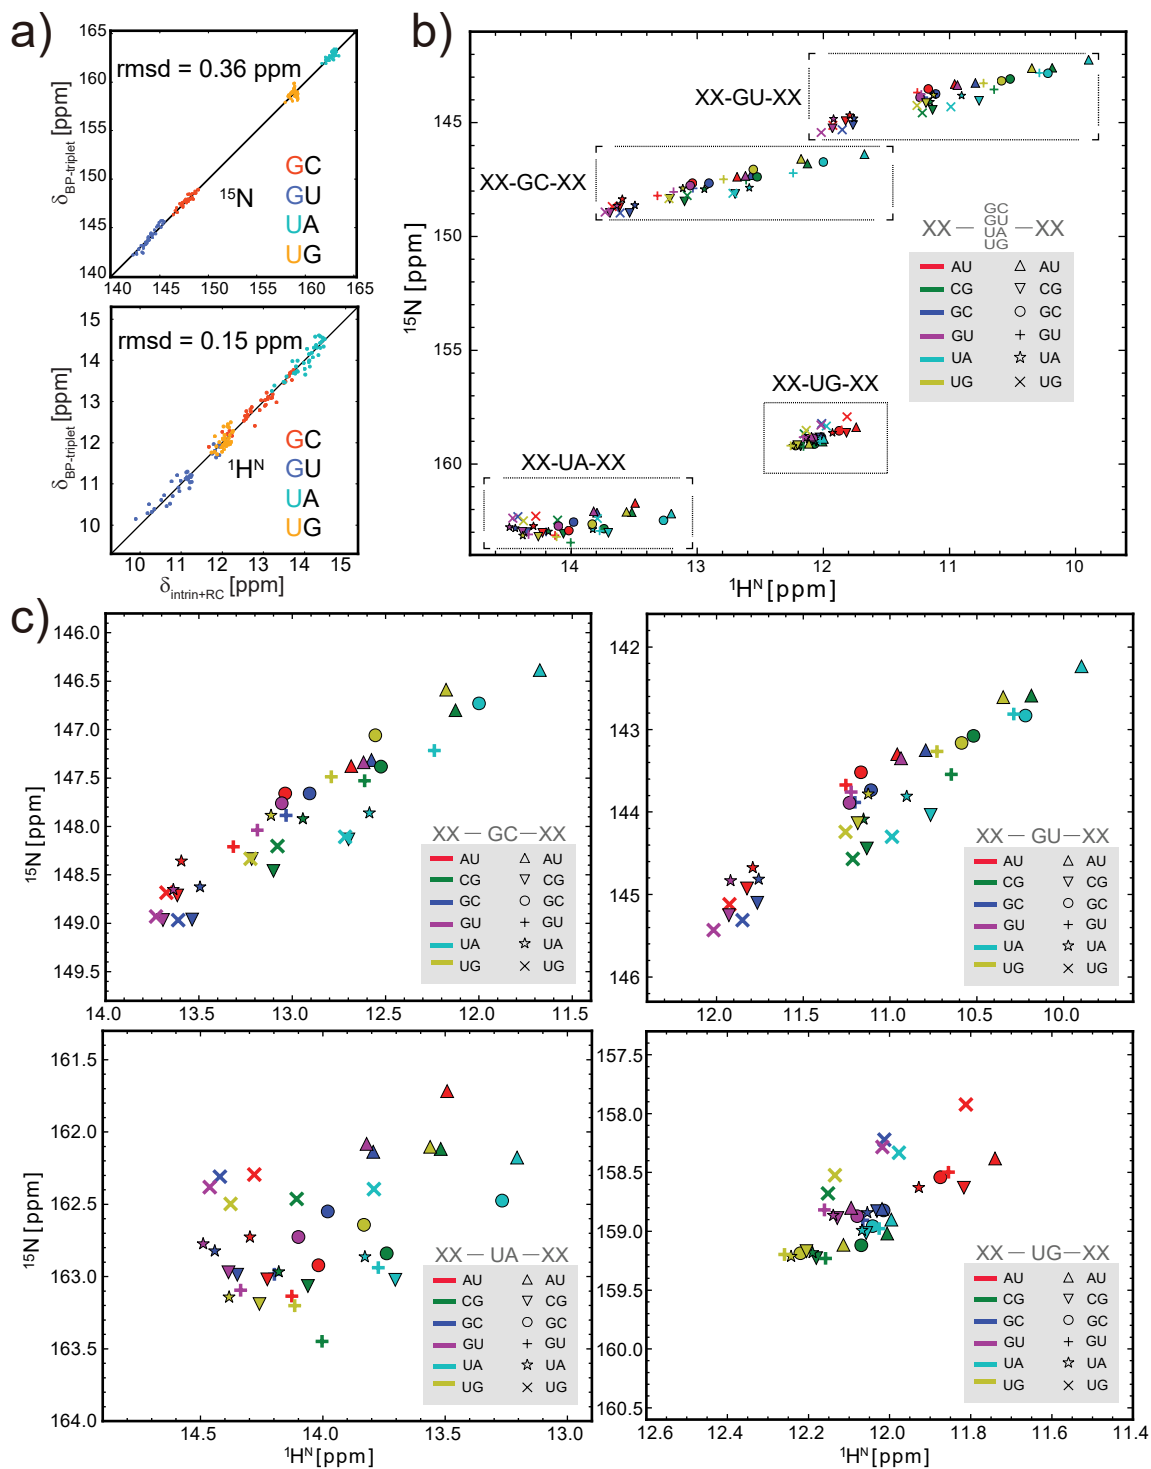



**Figure S11.** Comparison of  $^{15}\text{N}$  (upper panel) and  $^1\text{H}^{\text{N}}$  (lower panel) chemical shifts for the guanine in the CG closing base pair of UUCG tetraloops. The secondary structures of UUCG motifs are shown on top of each panel and the guanine of interest is highlighted in red. The horizontal line in each subplot marks the sum of chemical shift contributions from the central CG base pair and the base pair immediately below it. Resonances colored in cyan and black represent the total chemical shifts of the highlighted guanine by including the contribution from UUCG tetraloop through two approaches: prediction using the BP-triplet table (cyan); RC shift calculation using the original parameter set (black). The resonances colored in red represent experimental values.

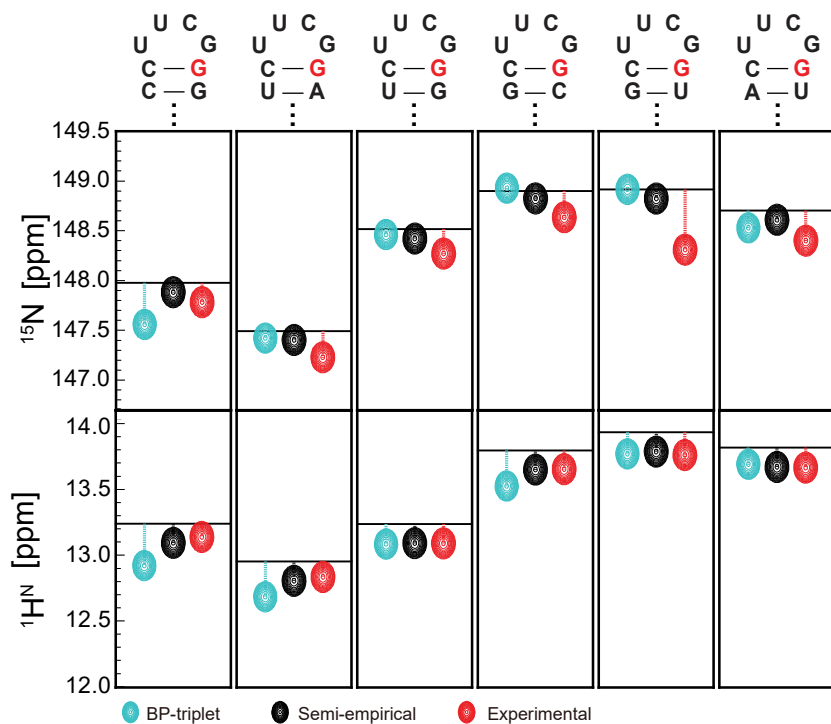

**Figure S12.** On-resonance  $R_{1\rho}$  profiles of residues G164, U167, G174, G175 and G176 in P5c stem of P5abc. All the data were jointly fit to a simple two-state model. The error bars represent standard deviations (s.d.) estimated using Monte Carlo simulation with 50 iterations.

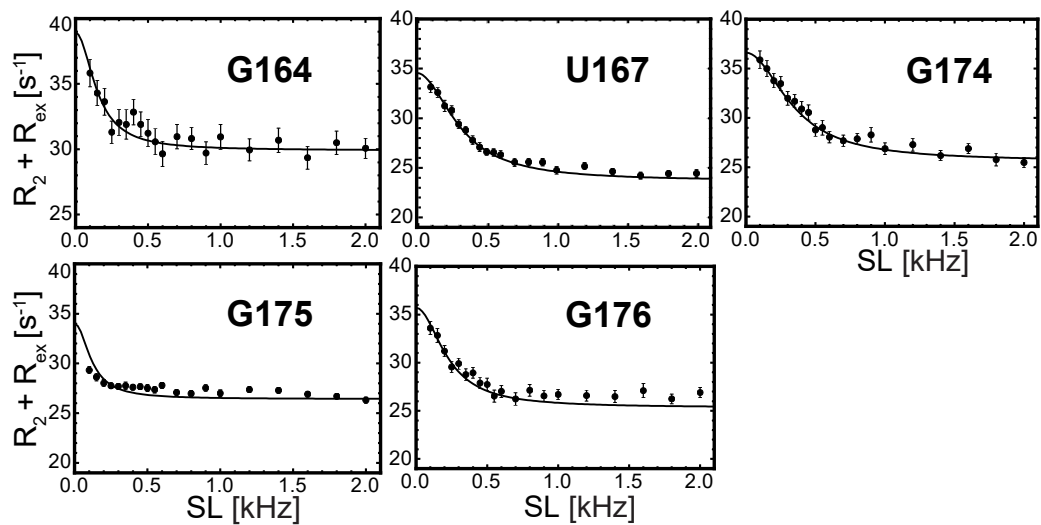

**Figure S13.**  $^{15}\text{N}$  CEST profiles of residues G164, U167, G174, G175 and G176 in P5c stem of P5abc.

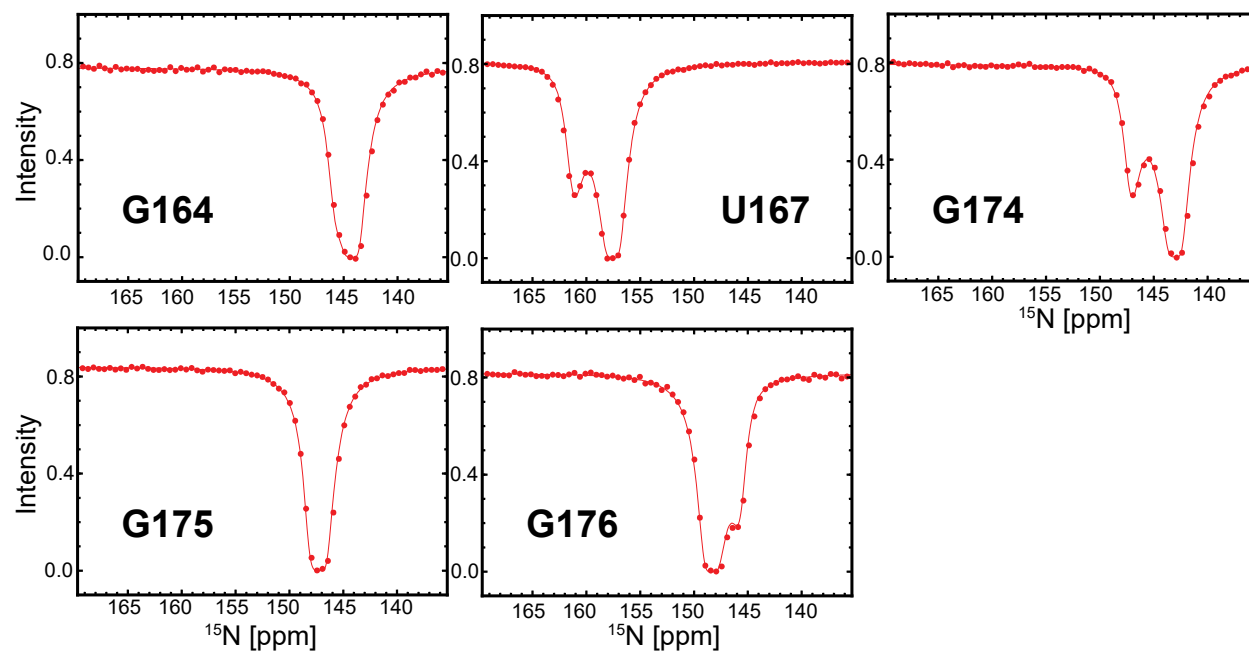



**Figure S15.** 2D  $^1\text{H}$ - $^{15}\text{N}$  HSQC spectrum (resonances colored in grey and red) of an unlabeled hairpin sample with pentaloop resembling P5c loop. This hairpin sample was prepared to collect chemical shifts of the BP-triplet centered on residue U167<sup>ES</sup> of P5abc (corresponding to U11 of this hairpin RNA, shown as the red resonance). In addition, a simulated resonance (colored in blue) is placed on the spectrum to indicate the predicted chemical shifts of the BP-triplet CG-UA-UA. This BP-triplet, except that the opened U-A is replaced with a Watson-Crick UA base pair, is the same as the one centered on U11.

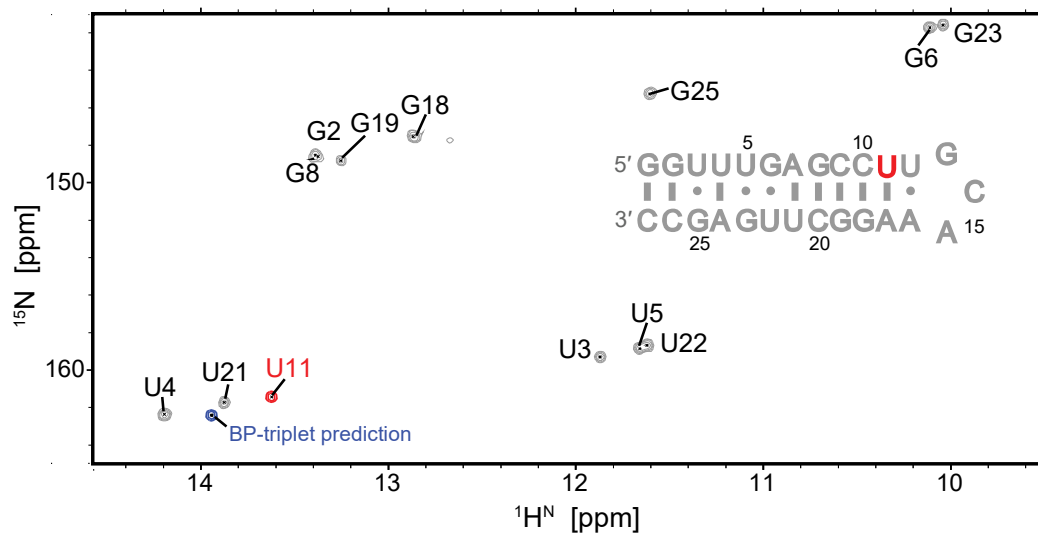

# Supplementary Tables

**Table S1.** Hairpin RNA sequences and BMRB items in the training dataset.

| RNA sample | Sequence or BMRB ID                                         |
|------------|-------------------------------------------------------------|
| HP15       | GGAUUCGUGGCACUUCGGUGCUAUGAGUCC                              |
| HP16       | GGGCAAUAUGUCCUUCGGGGUGUAUUGUCC                              |
| HP17       | GGGUUGACUUUGCUUCGGUAGAGUUAACCC                              |
| HP18       | GGUCGUGUUCUACUUCGGUAGGGCGCGACC                              |
| HP19       | GGCCAUUGGAAUCUUCGGGUUUCGAUGGCC                              |
| HP20       | GGUGUUAAGGAGCUUCGGCUCUUUAGUACC                              |
| HP21       | GGGGGAUGUUGCUUCGGUGAUAUCCCUCC                               |
| HP22       | GGAAAGAGCUCGCUUCGGCGGGUUCUUUCC                              |
| HP23-GC    | GGACGCCUGCGACUUCGGUUGUAGGUGUCC                              |
| HP23-GU3   | GGACGCCUGGGACUUCGGUUUUJAGGUGUCC                             |
| HP24       | GGACAGGUGCUGCUUCGGCGGCAUUUGUCC                              |
| HP25       | GGGCUGACUGGACUUCGGUUUGGUCAGUCC                              |
| HP26       | GGAUCAUCGGGGCUUCGGUCUUGAUGGUCC                              |
| HP27       | GGGUGGUUCCGUCUUCGGACGGAACCGUCC                              |
| HP28       | GGAACGAGGUGACUUCGGUCGUUUUGUUC                               |
| Rest01     | GGACUGUAAGUUCUUCGGAAUUUGUGGUCC                              |
| Rest02     | GGUUUUUUCUUACUUCGGUGAGGGGUAACC                              |
| Rest03     | GGAUGAGUUAGCUUCGGCUGUUUAUUC                                 |
| Rest04     | GGUCUUGAAAUCUUCGGUAUUUUGGGGCC                               |
| Rest05     | GGGGCUACUAUCUUCGGAUAGUAGGUCCC                               |
| Rest06     | GGGCAGAUCAUGCUUCGGCGUGGUUUUGUCC                             |
| Rest07     | GGGUGUCUUUUACUUCGGUGGAAGACAUC                               |
| Rest08     | GGUCAGUGGUCGCUUCGGCGGCCCGUGACC                              |
| Rest09     | GGAUAUGCACCUCUUCGGGGGUGUGUCC                                |
| Rest10     | GGCGUGUUGGGUCUUCGGACCCAUUGCGCC                              |
| HP-GU      | GGAUUCGGAUUGGUUCGCUAGUCUGGAUCC                              |
| PL01       | GGGCCUGCCGGAACGUUCGGUAGGCC                                  |
| PL02       | GGGCUCGUCGGUACGUACCGAUAGGCC                                 |
| PL03       | GGGCUGUUCGGGAACGUUCCGAACGGCC                                |
| PL04       | GGGUUCGUCGGCAACGUGCCGACGAGGCC                               |
| BMRB ID    | 4125 4135 4175 4226 4250 4253 4750 4780 4816 5007           |
|            | 5046 5256 5321 5371 5395 5528 5553 5614 5632 5655           |
|            | 5705 5834 5852 5919 5932 5962 5980 6062 6076 6077           |
|            | 6094 6115 6239 6320 6485 6543 6562 6633 6652 6756           |
|            | 7098 7230 7403 7404 7405 10014 11014 15080 15319 15417      |
|            | 15538 15571 15656 15697 15745 15780 15781 15786 15856 15858 |
|            | 16479 16714 16950 16951 16952 16953 17188 17292 17309 17316 |
|            | 17326 17406 17436 17520 17566 17567 17568 17671 17682 17860 |
|            | 17861 17901 17941 17961 17972 18239 18240 18336 18503 18515 |
|            | 18532 18534 18656 18838 18891 18892 18894 18975 19018 19039 |
|            | 19040 19545 19634 19662 19692 25049 25163 25291 25415 25416 |
|            | 25603 25604 25654 25780 25781 25784 25785 25811 25867 26032 |
|            | 26033 26568 26842 26938 30026 30046 30049 30051 30108 30132 |
|            | 30224 30257 30258 30268 30282 30283 34038 34100             |

**Table S2.** BP-triplet lookup table that relates each BP-triplet to the average experimental imino chemical shifts of multiple occurrences.

| BP-triplet | Chemical Shift of $^{15}\text{N}$ [ppm] | Standard deviation $^{15}\text{N}$ [ppm] | Chemical Shift of $^1\text{H}^{\text{N}}$ [ppm] | Standard deviation $^1\text{H}^{\text{N}}$ [ppm] | Total occurrences of $^{15}\text{N}$ | Total occurrences of $^1\text{H}^{\text{N}}$ | Occurrences of $^{15}\text{N}$ & $^1\text{H}^{\text{N}}$ in hairpin RNAs |
|------------|-----------------------------------------|------------------------------------------|-------------------------------------------------|--------------------------------------------------|--------------------------------------|----------------------------------------------|--------------------------------------------------------------------------|
| AU-GC-AU   | 147.24                                  | 0.22                                     | 12.82                                           | 0.07                                             | 9                                    | 18                                           | 2                                                                        |
| AU-GC-CG   | 148.57                                  | 0.22                                     | 13.61                                           | 0.08                                             | 20                                   | 27                                           | 3                                                                        |
| AU-GC-GC   | 147.68                                  | 0.24                                     | 13.03                                           | 0.09                                             | 13                                   | 23                                           | 2                                                                        |
| AU-GC-GU   | 148.40                                  | 0.28                                     | 12.98                                           | 0.06                                             | 2                                    | 2                                            | 2                                                                        |
| AU-GC-UA   | 148.52                                  | 0.14                                     | 13.61                                           | 0.07                                             | 16                                   | 22                                           | 2                                                                        |
| AU-GC-UG   | 148.62                                  | 0.19                                     | 13.71                                           | 0.02                                             | 3                                    | 3                                            | 2                                                                        |
| AU-GU-AU   | 142.88                                  | 0.16                                     | 10.82                                           | 0.06                                             | 5                                    | 6                                            | 2                                                                        |
| AU-GU-CG   | 145.53                                  | 0.28                                     | 11.81                                           | 0.07                                             | 4                                    | 6                                            | 2                                                                        |
| AU-GU-GC   | 143.49                                  | 0.03                                     | 11.10                                           | 0.06                                             | 2                                    | 4                                            | 2                                                                        |
| AU-GU-GU   | 143.40                                  | 0.03                                     | 11.05                                           | 0.02                                             | 2                                    | 2                                            | 2                                                                        |
| AU-GU-UA   | 145.07                                  | 0.08                                     | 11.96                                           | 0.04                                             | 3                                    | 3                                            | 3                                                                        |
| AU-GU-UG   | 145.04                                  | 0.01                                     | 11.70                                           | 0.07                                             | 2                                    | 2                                            | 2                                                                        |
| AU-UA-AU   | 161.93                                  | 0.17                                     | 13.48                                           | 0.07                                             | 20                                   | 24                                           | 3                                                                        |
| AU-UA-CG   | 162.76                                  | 0.18                                     | 14.31                                           | 0.08                                             | 13                                   | 31                                           | 4                                                                        |
| AU-UA-GC   | 162.30                                  | 0.07                                     | 13.65                                           | 0.08                                             | 7                                    | 15                                           | 2                                                                        |
| AU-UA-GU   | 162.81                                  | 0.21                                     | 13.85                                           | 0.06                                             | 4                                    | 5                                            | 2                                                                        |
| AU-UA-UA   | 162.62                                  | 0.15                                     | 14.31                                           | 0.08                                             | 7                                    | 14                                           | 3                                                                        |
| AU-UA-UG   | 162.35                                  | 0.13                                     | 14.37                                           | 0.05                                             | 4                                    | 5                                            | 2                                                                        |
| AU-UG-AU   | 158.60                                  | 0.10                                     | 11.76                                           | 0.08                                             | 2                                    | 3                                            | 2                                                                        |
| AU-UG-CG   | 158.87                                  | 0.18                                     | 12.16                                           | 0.08                                             | 7                                    | 8                                            | 4                                                                        |
| AU-UG-GC   | 158.78                                  | 0.13                                     | 11.72                                           | 0.04                                             | 3                                    | 4                                            | 3                                                                        |
| AU-UG-GU   | 158.87                                  | 0.07                                     | 11.91                                           | 0.09                                             | 3                                    | 3                                            | 3                                                                        |
| AU-UG-UA   | 159.01                                  | 0.11                                     | 12.01                                           | 0.03                                             | 3                                    | 3                                            | 3                                                                        |
| AU-UG-UG   | 157.91                                  | 0.06                                     | 11.78                                           | 0.05                                             | 2                                    | 2                                            | 2                                                                        |
| CG-GC-AU   | 146.56                                  | 0.19                                     | 12.21                                           | 0.11                                             | 11                                   | 13                                           | 5                                                                        |
| CG-GC-CG   | 147.92                                  | 0.11                                     | 13.06                                           | 0.07                                             | 15                                   | 19                                           | 3                                                                        |
| CG-GC-GC   | 147.11                                  | 0.11                                     | 12.53                                           | 0.07                                             | 15                                   | 22                                           | 6                                                                        |
| CG-GC-GU   | 147.76                                  | 0.17                                     | 12.63                                           | 0.14                                             | 4                                    | 5                                            | 2                                                                        |
| CG-GC-UA   | 147.68                                  | 0.19                                     | 13.03                                           | 0.08                                             | 14                                   | 19                                           | 2                                                                        |
| CG-GC-UG   | 147.99                                  | 0.23                                     | 13.22                                           | 0.09                                             | 6                                    | 8                                            | 2                                                                        |
| CG-GU-AU   | 142.40                                  | 0.16                                     | 10.29                                           | 0.01                                             | 3                                    | 3                                            | 3                                                                        |
| CG-GU-CG   | 144.76                                  | 0.12                                     | 11.16                                           | 0.06                                             | 6                                    | 6                                            | 3                                                                        |
| CG-GU-GC   | 143.15                                  | 0.16                                     | 10.61                                           | 0.07                                             | 9                                    | 9                                            | 3                                                                        |
| CG-GU-GU   | 143.27                                  | 0.32                                     | 10.46                                           | 0.06                                             | 3                                    | 4                                            | 2                                                                        |
| CG-GU-UA   | 144.43                                  | 0.15                                     | 11.30                                           | 0.08                                             | 3                                    | 4                                            | 3                                                                        |
| CG-GU-UG   | 144.36                                  | 0.06                                     | 11.04                                           | 0.01                                             | 2                                    | 2                                            | 2                                                                        |
| CG-UA-AU   | 161.92                                  | 0.30                                     | 13.46                                           | 0.06                                             | 5                                    | 9                                            | 2                                                                        |
| CG-UA-CG   | 162.98                                  | 0.13                                     | 14.28                                           | 0.07                                             | 20                                   | 34                                           | 2                                                                        |
| CG-UA-GC   | 162.35                                  | 0.23                                     | 13.69                                           | 0.07                                             | 13                                   | 23                                           | 2                                                                        |
| CG-UA-GU   | 162.70                                  | 0.14                                     | 13.79                                           | 0.04                                             | 4                                    | 4                                            | 3                                                                        |
| CG-UA-UA   | 162.67                                  | 0.22                                     | 14.19                                           | 0.05                                             | 12                                   | 19                                           | 2                                                                        |
| CG-UA-UG   | 162.22                                  | 0.06                                     | 14.15                                           | 0.05                                             | 6                                    | 6                                            | 2                                                                        |
| CG-UG-AU   | 158.61                                  | 0.06                                     | 11.90                                           | 0.05                                             | 2                                    | 3                                            | 2                                                                        |
| CG-UG-CG   | 158.25                                  | 0.12                                     | 12.18                                           | 0.07                                             | 3                                    | 5                                            | 3                                                                        |
| CG-UG-GC   | 158.71                                  | 0.13                                     | 11.96                                           | 0.12                                             | 8                                    | 8                                            | 3                                                                        |
| CG-UG-GU   | 158.79                                  | 0.11                                     | 12.11                                           | 0.01                                             | 2                                    | 2                                            | 2                                                                        |
| CG-UG-UA   | 158.15                                  | 0.16                                     | 11.96                                           | 0.06                                             | 2                                    | 4                                            | 2                                                                        |
| CG-UG-UG   | 158.05                                  | 0.11                                     | 11.95                                           | 0.09                                             | 3                                    | 4                                            | 2                                                                        |
| GC-GC-AU   | 147.58                                  | 0.18                                     | 12.58                                           | 0.11                                             | 28                                   | 43                                           | 5                                                                        |
| GC-GC-CG   | 148.94                                  | 0.21                                     | 13.48                                           | 0.09                                             | 20                                   | 32                                           | 6                                                                        |
| GC-GC-GC   | 147.92                                  | 0.14                                     | 12.79                                           | 0.10                                             | 11                                   | 17                                           | 2                                                                        |
| GC-GC-GU   | 148.43                                  | 0.34                                     | 12.90                                           | 0.08                                             | 5                                    | 6                                            | 3                                                                        |
| GC-GC-UA   | 148.74                                  | 0.21                                     | 13.45                                           | 0.07                                             | 12                                   | 27                                           | 6                                                                        |

|          |        |      |       |      |    |    |    |
|----------|--------|------|-------|------|----|----|----|
| GC-GC-UG | 148.88 | 0.18 | 13.62 | 0.03 | 7  | 11 | 4  |
| GC-GU-AU | 143.15 | 0.15 | 10.70 | 0.05 | 6  | 8  | 2  |
| GC-GU-CG | 145.69 | 0.19 | 11.75 | 0.09 | 17 | 23 | 7  |
| GC-GU-GC | 143.61 | 0.30 | 11.13 | 0.08 | 5  | 7  | 3  |
| GC-GU-GU | 143.72 | 0.00 | 10.89 | 0.07 | 2  | 2  | 2  |
| GC-GU-UA | 145.26 | 0.21 | 11.73 | 0.04 | 7  | 8  | 4  |
| GC-GU-UG | 145.38 | 0.03 | 11.64 | 0.07 | 2  | 2  | 2  |
| GC-UA-AU | 162.27 | 0.09 | 13.72 | 0.04 | 14 | 18 | 3  |
| GC-UA-CG | 163.20 | 0.14 | 14.61 | 0.07 | 31 | 45 | 11 |
| GC-UA-GC | 162.50 | 0.10 | 13.94 | 0.08 | 12 | 23 | 2  |
| GC-UA-GU | 162.84 | 0.21 | 14.07 | 0.06 | 5  | 5  | 3  |
| GC-UA-UA | 162.89 | 0.11 | 14.55 | 0.08 | 20 | 30 | 5  |
| GC-UA-UG | 162.40 | 0.12 | 14.47 | 0.07 | 5  | 5  | 3  |
| GC-UG-AU | 158.90 | 0.29 | 11.92 | 0.12 | 5  | 5  | 3  |
| GC-UG-CG | 159.35 | 0.23 | 12.40 | 0.08 | 14 | 20 | 7  |
| GC-UG-GC | 159.26 | 0.21 | 11.93 | 0.06 | 6  | 6  | 3  |
| GC-UG-GU | 159.57 | 0.03 | 12.12 | 0.07 | 3  | 3  | 3  |
| GC-UG-UA | 159.34 | 0.15 | 12.19 | 0.11 | 4  | 6  | 2  |
| GC-UG-UG | 158.54 | 0.03 | 12.10 | 0.06 | 2  | 3  | 2  |
| GU-GC-AU | 147.42 | 0.16 | 12.68 | 0.05 | 2  | 5  | 2  |
| GU-GC-CG | 148.93 | 0.13 | 13.52 | 0.10 | 7  | 10 | 3  |
| GU-GC-GC | 147.56 | 0.20 | 12.92 | 0.11 | 6  | 7  | 2  |
| GU-GC-GU | 148.46 | 0.28 | 13.08 | 0.09 | 4  | 4  | 2  |
| GU-GC-UA | 148.53 | 0.15 | 13.69 | 0.09 | 2  | 2  | 2  |
| GU-GC-UG | 148.92 | 0.27 | 13.77 | 0.02 | 3  | 3  | 2  |
| GU-GU-AU | 143.15 | 0.08 | 10.91 | 0.04 | 2  | 2  | 2  |
| GU-GU-CG | 145.75 | 0.08 | 11.90 | 0.02 | 2  | 3  | 2  |
| GU-GU-GC | 143.72 | 0.05 | 11.17 | 0.07 | 3  | 4  | 2  |
| GU-GU-GU | 143.66 | 0.15 | 11.21 | 0.03 | 2  | 2  | 2  |
| GU-GU-UA | 145.23 | 0.15 | 11.95 | 0.08 | 2  | 2  | 2  |
| GU-GU-UG | 145.61 | 0.00 | 11.95 | 0.00 | 2  | 2  | 2  |
| GU-UA-AU | 162.56 | 0.00 | 13.74 | 0.05 | 2  | 2  | 2  |
| GU-UA-CG | 163.40 | 0.21 | 14.58 | 0.10 | 8  | 8  | 5  |
| GU-UA-GC | 163.10 | 0.23 | 13.96 | 0.09 | 6  | 7  | 3  |
| GU-UA-GU | 163.29 | 0.08 | 14.13 | 0.03 | 2  | 2  | 2  |
| GU-UA-UA | 163.21 | 0.26 | 14.51 | 0.06 | 5  | 6  | 3  |
| GU-UA-UG | 162.24 | 0.17 | 14.34 | 0.10 | 2  | 2  | 2  |
| GU-UG-AU | 159.12 | 0.02 | 11.92 | 0.10 | 2  | 2  | 2  |
| GU-UG-CG | 159.32 | 0.17 | 12.39 | 0.05 | 2  | 2  | 2  |
| GU-UG-GC | 159.89 | 0.16 | 12.01 | 0.00 | 2  | 2  | 2  |
| GU-UG-GU | 159.85 | 0.44 | 12.37 | 0.06 | 2  | 2  | 2  |
| GU-UG-UA | 159.32 | 0.30 | 12.03 | 0.06 | 2  | 2  | 2  |
| GU-UG-UG | 158.68 | 0.17 | 12.08 | 0.08 | 2  | 2  | 2  |
| UA-GC-AU | 146.33 | 0.18 | 11.90 | 0.06 | 6  | 17 | 2  |
| UA-GC-CG | 147.97 | 0.17 | 12.75 | 0.08 | 17 | 27 | 2  |
| UA-GC-GC | 147.04 | 0.23 | 12.26 | 0.08 | 8  | 15 | 2  |
| UA-GC-GU | 147.29 | 0.18 | 12.17 | 0.08 | 2  | 3  | 2  |
| UA-GC-UA | 147.73 | 0.19 | 12.77 | 0.06 | 8  | 12 | 2  |
| UA-GC-UG | 147.89 | 0.10 | 12.86 | 0.07 | 7  | 11 | 3  |
| UA-GU-AU | 142.18 | 0.18 | 10.15 | 0.04 | 6  | 6  | 3  |
| UA-GU-CG | 144.32 | 0.12 | 11.06 | 0.05 | 5  | 5  | 3  |
| UA-GU-GC | 142.83 | 0.04 | 10.50 | 0.03 | 2  | 3  | 2  |
| UA-GU-GU | 142.75 | 0.18 | 10.32 | 0.00 | 2  | 2  | 2  |
| UA-GU-UA | 144.05 | 0.10 | 11.21 | 0.02 | 2  | 3  | 2  |
| UA-GU-UG | 144.33 | 0.36 | 11.07 | 0.01 | 2  | 2  | 2  |
| UA-UA-AU | 162.25 | 0.12 | 13.26 | 0.07 | 3  | 4  | 2  |
| UA-UA-CG | 163.15 | 0.27 | 13.98 | 0.08 | 28 | 47 | 6  |
| UA-UA-GC | 162.64 | 0.12 | 13.39 | 0.07 | 5  | 9  | 2  |
| UA-UA-GU | 163.19 | 0.15 | 13.68 | 0.13 | 2  | 2  | 2  |
| UA-UA-UA | 163.08 | 0.20 | 13.99 | 0.12 | 8  | 11 | 2  |
| UA-UA-UG | 162.52 | 0.16 | 13.85 | 0.12 | 5  | 7  | 3  |
| UA-UG-AU | 158.54 | 0.17 | 11.78 | 0.09 | 6  | 6  | 3  |



|          |        |      |       |      |     |      |     |
|----------|--------|------|-------|------|-----|------|-----|
| UA-UG-CG | 158.75 | 0.30 | 12.08 | 0.05 | 3   | 5    | 2   |
| UA-UG-GC | 158.93 | 0.16 | 11.84 | 0.03 | 4   | 4    | 3   |
| UA-UG-GU | 159.06 | 0.21 | 11.96 | 0.17 | 2   | 2    | 2   |
| UA-UG-UA | 158.65 | 0.09 | 12.00 | 0.09 | 5   | 6    | 2   |
| UA-UG-UG | 158.45 | 0.42 | 11.89 | 0.17 | 2   | 2    | 2   |
| UG-GC-AU | 146.74 | 0.20 | 12.29 | 0.07 | 4   | 4    | 4   |
| UG-GC-CG | 147.98 | 0.20 | 13.10 | 0.09 | 5   | 6    | 2   |
| UG-GC-GC | 147.47 | 0.31 | 12.65 | 0.01 | 3   | 3    | 2   |
| UG-GC-GU | 147.67 | 0.29 | 12.41 | 0.07 | 3   | 3    | 2   |
| UG-GC-UA | 147.94 | 0.25 | 13.12 | 0.07 | 5   | 6    | 3   |
| UG-GC-UG | 148.11 | 0.26 | 13.18 | 0.06 | 5   | 5    | 2   |
| UG-GU-AU | 142.26 | 0.28 | 10.39 | 0.08 | 2   | 2    | 2   |
| UG-GU-CG | 144.20 | 0.03 | 11.16 | 0.07 | 3   | 3    | 3   |
| UG-GU-GC | 142.47 | 0.14 | 10.72 | 0.02 | 2   | 2    | 2   |
| UG-GU-GU | 142.37 | 0.09 | 10.52 | 0.04 | 2   | 2    | 2   |
| UG-GU-UA | 143.93 | 0.12 | 11.28 | 0.02 | 3   | 3    | 3   |
| UG-GU-UG | 143.97 | 0.16 | 11.21 | 0.09 | 2   | 2    | 2   |
| UG-UA-AU | 162.28 | 0.05 | 13.61 | 0.02 | 4   | 4    | 2   |
| UG-UA-CG | 163.40 | 0.13 | 14.58 | 0.08 | 4   | 7    | 3   |
| UG-UA-GC | 162.57 | 0.30 | 13.73 | 0.09 | 3   | 4    | 2   |
| UG-UA-GU | 163.12 | 0.01 | 14.00 | 0.06 | 2   | 2    | 2   |
| UG-UA-UA | 162.74 | 0.22 | 14.31 | 0.12 | 2   | 3    | 2   |
| UG-UA-UG | 162.73 | 0.04 | 14.42 | 0.03 | 2   | 2    | 2   |
| UG-UG-AU | 158.41 | 0.18 | 12.03 | 0.02 | 2   | 2    | 2   |
| UG-UG-CG | 158.70 | 0.17 | 12.50 | 0.10 | 2   | 2    | 2   |
| UG-UG-GC | 158.68 | 0.20 | 12.02 | 0.09 | 3   | 4    | 2   |
| UG-UG-GU | 158.97 | 0.24 | 12.29 | 0.07 | 2   | 2    | 2   |
| UG-UG-UA | 158.42 | 0.02 | 12.25 | 0.09 | 2   | 2    | 2   |
| UG-UG-UG | 158.29 | 0.14 | 12.45 | 0.10 | 2   | 2    | 2   |
| Total    |        |      |       |      | 853 | 1198 | 381 |

**Table S3.** Hairpin RNA sequences and BMRB items in the testing dataset.

| RNA sample       | Sequence / ID                                           |
|------------------|---------------------------------------------------------|
| Rest11           | GGCCUUCUGUUGCUUCGGUAGCGGAAGGCC                          |
| Rest12           | GGGAUGGCUCGGCUUCGGCCGAGCUAUUCC                          |
| Rest13           | GGUGCGUUUCGGCUUCGGUUGGAACGUACC                          |
| Rest14           | GGAGCUCGCUACCUUCGGGUAGCGGGUUC                           |
| Rest15           | GGAGGUACAGGCCUUCGGGUUUGUGCUUCC                          |
| Rest16           | GGAGGCGGUGUUCUUCGGGACACUGCCUCC                          |
| Rest17           | GGGAUACAGUCCCUUCGGGGUUGUGUCCC                           |
| Rest18           | GGUGUCGCGAUGCUUCGGUAUUGCGAUACC                          |
| Rest19           | GGGGUGCCAUUCUUCGAAUGGCGUCC                              |
| UU1              | GGCGUGUGUCUGGUUCGCCUGAU AUGGCC                          |
| P5abc            | GGCAGUACCAAGUCGCGAAAGCGAUGGCCUUGCAAAGGGUAUGGUAUAAGCUGCC |
| Gln-riboswitch   | GGCGUUGGCCAGUUUAUCUGGGUGGAAGUAAGGUCUUUGGCCUGAAGCAACGCG  |
| HIV-1 TAR        | GGCAGAUCUGAGCCUGGGAGCUCUCUGCC                           |
| Bacterial A-site | GGCGUCACACGCUUCGGCGUGAAGUCGCC                           |
| BMRB ID          | 4346 4694 15257 15859 25164* 30452 34259                |

\* A guanine residue in this entry (G20) is pre-excluded because it is severely affected by the pseudoknot.

**Table S4.** The root-mean-square deviations (rmsd) between experimental chemical shifts in the testing dataset and chemical shifts predicted by BP-triplet lookup tables derived from the training dataset.

| Training dataset | Testing dataset | GC/GU   |         | UA/UG   |         | All     |         |
|------------------|-----------------|---------|---------|---------|---------|---------|---------|
|                  |                 | N [ppm] | H [ppm] | N [ppm] | H [ppm] | N [ppm] | H [ppm] |
| TRAINING         | TESTING         | 0.179   | 0.096   | 0.209   | 0.100   | 0.193   | 0.097   |
| 30 hairpins      | BMRB            | 0.236   | 0.095   | 0.233   | 0.090   | 0.234   | 0.093   |
| 30 hairpins      | TESTING         | 0.212   | 0.104   | 0.249   | 0.111   | 0.222   | 0.105   |
| BMRB             | TESTING         | 0.236   | 0.110   | 0.271   | 0.107   | 0.246   | 0.107   |

**TRAINING:** the original training dataset; **TESTING:** the original testing dataset; **30 hairpins:** the data collected from the 30 hairpins in TRAINING; **BMRB:** BMRB entries in TRAINING.

**Table S5.** The root-mean-square deviations (rmsd) between experimental chemical shifts and the result calculated by ring-current model using BP-triplet (left column) or BP-pentalet (right column). BP-pentalet consists of the central base pair, two neighboring base pairs towards 5', and two neighboring base pairs towards 3'. The A-form helix structures were built by RNAComposer.

| Central base pair |   | rmsd (BP-triplet) [ppm] | rmsd (BP-pentalet) [ppm] |
|-------------------|---|-------------------------|--------------------------|
| GC                | N | 0.266                   | 0.262                    |
|                   | H | 0.164                   | 0.148                    |
| UA                | N | 0.348                   | 0.341                    |
|                   | H | 0.170                   | 0.169                    |
| GU                | N | 0.613                   | 0.609                    |
|                   | H | 0.161                   | 0.154                    |
| UG                | N | 0.599                   | 0.601                    |
|                   | H | 0.174                   | 0.174                    |

**Table S6.** The root-mean-square deviations (rmsd) between experimental chemical shifts and calculated chemical shifts for the guanine in the closing CG base pair of UUCG tetraloop. The contribution from the base pair immediately below CG and the intrinsic chemical shift are taken from Table 2. The RC shifts were calculated against three NMR structures (2KOC, 2M4Q and 5IEM) and two crystal structures (1F7Y and 5Y85) using different parameter sets: the superscript 'DC' means DC set; the superscript 'calib' means re-calibrated DC set with  $^{15}\text{N}$  parameters optimized. For NMR structures, each conformation in the ensemble was calculated individually. For crystal structures, TL1 represents the first tetraloop while TL2 the second.

| Structure       |                  | RC <sup>DC</sup> H<br>[ppm] | RC <sup>DC+EF<sup>DC</sup></sup><br>H [ppm] | RC <sup>DC</sup> N<br>[ppm] | RC <sup>calib</sup> N<br>[ppm] |
|-----------------|------------------|-----------------------------|---------------------------------------------|-----------------------------|--------------------------------|
| 2KOC<br>(NMR)   | 1 <sup>st</sup>  | 0.060                       | 0.065                                       | 0.247                       | 0.152                          |
|                 | 2 <sup>nd</sup>  | 0.062                       | 0.085                                       | 0.239                       | 0.147                          |
|                 | 3 <sup>rd</sup>  | 0.060                       | 0.070                                       | 0.255                       | 0.162                          |
|                 | 4 <sup>th</sup>  | 0.060                       | 0.079                                       | 0.239                       | 0.158                          |
|                 | 5 <sup>th</sup>  | 0.067                       | 0.060                                       | 0.267                       | 0.229                          |
|                 | 6 <sup>th</sup>  | 0.063                       | 0.091                                       | 0.244                       | 0.151                          |
|                 | 7 <sup>th</sup>  | 0.060                       | 0.087                                       | 0.221                       | 0.144                          |
|                 | 8 <sup>th</sup>  | 0.077                       | 0.096                                       | 0.224                       | 0.180                          |
|                 | 9 <sup>th</sup>  | 0.060                       | 0.071                                       | 0.237                       | 0.153                          |
|                 | 10 <sup>th</sup> | 0.061                       | 0.062                                       | 0.258                       | 0.202                          |
|                 | 11 <sup>th</sup> | 0.065                       | 0.089                                       | 0.239                       | 0.153                          |
|                 | 12 <sup>th</sup> | 0.067                       | 0.063                                       | 0.277                       | 0.257                          |
|                 | 13 <sup>th</sup> | 0.062                       | 0.083                                       | 0.240                       | 0.151                          |
|                 | 14 <sup>th</sup> | 0.062                       | 0.085                                       | 0.261                       | 0.238                          |
|                 | 15 <sup>th</sup> | 0.063                       | 0.061                                       | 0.264                       | 0.208                          |
|                 | 16 <sup>th</sup> | 0.067                       | 0.083                                       | 0.231                       | 0.153                          |
|                 | 17 <sup>th</sup> | 0.066                       | 0.078                                       | 0.219                       | 0.181                          |
|                 | 18 <sup>th</sup> | 0.065                       | 0.063                                       | 0.245                       | 0.219                          |
|                 | 19 <sup>th</sup> | 0.060                       | 0.066                                       | 0.243                       | 0.147                          |
|                 | 20 <sup>th</sup> | 0.060                       | 0.083                                       | 0.245                       | 0.157                          |
|                 | Mean             | 0.060                       | 0.074                                       | 0.244                       | 0.158                          |
| 2M4Q<br>(NMR)   | 1 <sup>st</sup>  | 0.144                       | 0.068                                       | 0.356                       | 0.478                          |
|                 | 2 <sup>nd</sup>  | 0.142                       | 0.073                                       | 0.353                       | 0.494                          |
|                 | 3 <sup>rd</sup>  | 0.142                       | 0.121                                       | 0.352                       | 0.515                          |
|                 | 4 <sup>th</sup>  | 0.147                       | 0.119                                       | 0.323                       | 0.388                          |
|                 | 5 <sup>th</sup>  | 0.155                       | 0.092                                       | 0.357                       | 0.530                          |
|                 | 6 <sup>th</sup>  | 0.143                       | 0.120                                       | 0.347                       | 0.535                          |
|                 | 7 <sup>th</sup>  | 0.155                       | 0.080                                       | 0.371                       | 0.575                          |
|                 | 8 <sup>th</sup>  | 0.071                       | 0.120                                       | 0.302                       | 0.251                          |
|                 | 9 <sup>th</sup>  | 0.119                       | 0.084                                       | 0.332                       | 0.377                          |
|                 | 10 <sup>th</sup> | 0.147                       | 0.144                                       | 0.355                       | 0.561                          |
|                 | Mean             | 0.135                       | 0.077                                       | 0.345                       | 0.469                          |
| 5IEM<br>(NMR)   | 1 <sup>st</sup>  | 0.098                       | 0.063                                       | 0.285                       | 0.409                          |
|                 | 2 <sup>nd</sup>  | 0.101                       | 0.087                                       | 0.281                       | 0.415                          |
|                 | 3 <sup>rd</sup>  | 0.091                       | 0.064                                       | 0.268                       | 0.392                          |
|                 | 4 <sup>th</sup>  | 0.105                       | 0.079                                       | 0.291                       | 0.435                          |
|                 | 5 <sup>th</sup>  | 0.101                       | 0.066                                       | 0.284                       | 0.408                          |
|                 | 6 <sup>th</sup>  | 0.082                       | 0.060                                       | 0.250                       | 0.363                          |
|                 | 7 <sup>th</sup>  | 0.096                       | 0.074                                       | 0.275                       | 0.421                          |
|                 | 8 <sup>th</sup>  | 0.096                       | 0.063                                       | 0.283                       | 0.402                          |
|                 | 9 <sup>th</sup>  | 0.079                       | 0.074                                       | 0.286                       | 0.351                          |
|                 | 10 <sup>th</sup> | 0.097                       | 0.070                                       | 0.282                       | 0.427                          |
|                 | Mean             | 0.094                       | 0.068                                       | 0.279                       | 0.402                          |
| 1F7Y<br>(X-ray) | TL1              | 0.082                       | 0.087                                       | 0.238                       | 0.149                          |
|                 | TL2              | 0.060                       | 0.071                                       | 0.271                       | 0.247                          |
| 5Y85<br>(X-ray) | TL1              | 0.061                       | 0.060                                       | 0.272                       | 0.274                          |
|                 | TL2              | 0.061                       | 0.065                                       | 0.250                       | 0.208                          |

**Table S7.** Chemical shift changes due to single-nucleotide register shift in BP-triplets.

| GS       | ES       | $\Delta\omega_N$<br>[ppm] | $\Delta\omega_H$<br>[ppm] | GS       | ES       | $\Delta\omega_N$<br>[ppm] | $\Delta\omega_H$<br>[ppm] |
|----------|----------|---------------------------|---------------------------|----------|----------|---------------------------|---------------------------|
| GU-GC-GC | GC-GC-GU | -0.87                     | 0.03                      | GC-GC-GU | GU-GC-GC | 0.87                      | -0.03                     |
| GC-GC-GU | GC-GC-GC | 0.51                      | 0.10                      | GC-GC-GC | GC-GC-GU | -0.51                     | -0.10                     |
| GU-GC-GC | GC-GC-GC | -0.36                     | 0.13                      | GC-GC-GC | GU-GC-GC | 0.36                      | -0.13                     |
| UA-UA-UA | UA-UA-UG | 0.57                      | 0.14                      | UA-UA-UG | UA-UA-UA | -0.57                     | -0.14                     |
| UG-UA-UA | UA-UA-UA | -0.34                     | 0.31                      | UA-UA-UA | UG-UA-UA | 0.34                      | -0.31                     |
| UG-UA-UA | UA-UA-UG | 0.23                      | 0.45                      | UA-UA-UG | UG-UA-UA | -0.23                     | -0.45                     |
| AU-GU-GC | AU-GU-GU | 0.09                      | 0.06                      | AU-GU-GU | AU-GU-GC | -0.09                     | -0.06                     |
| GU-GU-GU | GU-GU-GC | -0.06                     | 0.04                      | GU-GU-GC | GU-GU-GU | 0.06                      | -0.04                     |
| GU-GU-AU | GC-GU-AU | 0.00                      | 0.21                      | GC-GU-AU | GU-GU-AU | 0.00                      | -0.21                     |
| GU-GU-GC | GC-GU-GU | 0.00                      | 0.27                      | GC-GU-GU | GU-GU-GC | 0.00                      | -0.27                     |
| GU-GU-GU | GC-GU-GU | -0.06                     | 0.32                      | GC-GU-GU | GU-GU-GU | 0.06                      | -0.32                     |
| CG-UG-UA | CG-UG-UG | 0.09                      | 0.01                      | CG-UG-UG | CG-UG-UA | -0.09                     | -0.01                     |
| UG-UG-UG | UG-UG-UA | -0.13                     | 0.20                      | UG-UG-UA | UG-UG-UG | 0.13                      | -0.20                     |
| UG-UG-UA | UA-UG-UG | -0.04                     | 0.36                      | UA-UG-UG | UG-UG-UA | 0.04                      | -0.36                     |
| UG-UG-CG | UA-UG-CG | -0.05                     | 0.42                      | UA-UG-CG | UG-UG-CG | 0.05                      | -0.42                     |
| UG-UG-UG | UA-UG-UG | -0.17                     | 0.56                      | UA-UG-UG | UG-UG-UG | 0.17                      | -0.56                     |
| UG-UA-UG | UA-UG-UG | 4.28                      | 2.54                      | UA-UG-UG | UG-UA-UG | -4.28                     | -2.54                     |
| UG-UA-CG | UA-UG-CG | 4.64                      | 2.50                      | UA-UG-CG | UG-UA-CG | -4.64                     | -2.50                     |
| UG-UA-UG | UA-UG-UA | 4.09                      | 2.43                      | UA-UG-UA | UG-UA-UG | -4.09                     | -2.43                     |
| UG-UA-UA | UA-UG-UA | 4.09                      | 2.31                      | UA-UG-UA | UG-UA-UA | -4.09                     | -2.31                     |
| CG-UA-UA | CG-UG-UA | 4.53                      | 2.22                      | CG-UG-UA | CG-UA-UA | -4.53                     | -2.22                     |
| GU-GC-GU | GC-GU-GU | 4.74                      | 2.19                      | GC-GU-GU | GU-GC-GU | -4.74                     | -2.19                     |
| CG-UA-UG | CG-UG-UA | 4.07                      | 2.19                      | CG-UG-UA | CG-UA-UG | -4.07                     | -2.19                     |
| UG-UA-UG | UG-UG-UA | 4.32                      | 2.17                      | UG-UG-UA | UG-UA-UG | -4.32                     | -2.17                     |
| UG-UA-UA | UG-UG-UA | 4.33                      | 2.05                      | UG-UG-UA | UG-UA-UA | -4.33                     | -2.05                     |
| GC-GC-GU | GC-GU-GU | 4.72                      | 2.00                      | GC-GU-GU | GC-GC-GU | -4.72                     | -2.00                     |
| GU-GC-AU | GC-GU-AU | 4.27                      | 1.98                      | GC-GU-AU | GU-GC-AU | -4.27                     | -1.98                     |
| UA-UA-UG | UA-UG-UG | 4.06                      | 1.97                      | UA-UG-UG | UA-UA-UG | -4.06                     | -1.97                     |
| GU-GC-GU | GC-GU-GC | 4.85                      | 1.96                      | GC-GU-GC | GU-GC-GU | -4.85                     | -1.96                     |
| AU-GC-GC | AU-GU-GC | 4.19                      | 1.93                      | AU-GU-GC | AU-GC-GC | -4.19                     | -1.93                     |
| GU-GC-GU | GU-GU-GC | 4.74                      | 1.92                      | GU-GU-GC | GU-GC-GU | -4.74                     | -1.92                     |
| UA-UA-CG | UA-UG-CG | 4.40                      | 1.90                      | UA-UG-CG | UA-UA-CG | -4.40                     | -1.90                     |
| AU-GC-GU | AU-GU-GC | 4.91                      | 1.88                      | AU-GU-GC | AU-GC-GU | -4.91                     | -1.88                     |
| GC-GC-AU | GC-GU-AU | 4.44                      | 1.87                      | GC-GU-AU | GC-GC-AU | -4.44                     | -1.87                     |
| UA-UA-UG | UA-UG-UA | 3.87                      | 1.85                      | UA-UG-UA | UA-UA-UG | -3.87                     | -1.85                     |
| GU-GC-GC | GC-GU-GC | 3.95                      | 1.80                      | GC-GU-GC | GU-GC-GC | -3.95                     | -1.80                     |
| GC-GC-GU | GC-GU-GC | 4.82                      | 1.77                      | GC-GU-GC | GC-GC-GU | -4.82                     | -1.77                     |
| GU-GC-GC | GU-GU-GC | 3.84                      | 1.76                      | GU-GU-GC | GU-GC-GC | -3.84                     | -1.76                     |

**Table S8.** The exchange parameters of P5abc obtained by fitting  $^{15}\text{N}$   $R_{1\rho}$  data and  $^1\text{H}^{\text{N}}$  CEST data to a two-state model (see *Methods*), including the experimental and predicted imino chemical shifts of ES.

| Residue | $R_2$ ( $\text{s}^{-1}$ ) | $k_{\text{ex}}$        | $\rho_{\text{B}}$ | $\bar{\omega}_{\text{GS}}$ | $\Delta \bar{\omega}$ | $\bar{\omega}_{\text{ES}}^{\text{exptl}}$ | $\bar{\omega}_{\text{ES}}^{\text{pred}}$ |
|---------|---------------------------|------------------------|-------------------|----------------------------|-----------------------|-------------------------------------------|------------------------------------------|
|         |                           |                        |                   | [ppm]                      | [ppm]                 | [ppm]                                     | [ppm]                                    |
| G174-N1 | 25.59±0.17                |                        |                   | 143.57                     | 4.28±0.05             | 147.85                                    | 147.68                                   |
| G174-H1 | 29.99±2.96                |                        |                   | 11.03                      | 2.13±0.01             | 13.16                                     | 13.03                                    |
| U167-N3 | 23.65±0.12                |                        |                   | 158.12                     | 3.83±0.02             | 161.96                                    | 161.73                                   |
| U167-H3 | 23.24±1.84                |                        |                   | 11.92                      | 1.94±0.01             | 13.86                                     | 13.89                                    |
| G176-N1 | 25.36±0.17                | 437±17 $\text{s}^{-1}$ | 2.6±0.1%          | 148.97                     | -2.70±0.04            | 146.27                                    | 145.60                                   |
| G176-H1 | 48.19±7.29                |                        |                   | 13.57                      | -2.65±0.01            | 10.92                                     | 10.95                                    |
| G164-N1 | 29.91±0.25                |                        |                   | 144.80                     | 1.69±0.06             | 146.50                                    | 146.13                                   |
| G164-H1 | 12.04±9.84                |                        |                   | 11.13                      | -0.05±0.09            | 11.08                                     | 11.37                                    |
| G175-N1 | 25.95±0.21                |                        |                   | 147.76                     | 1.23±0.06             | 148.99                                    | 149.03                                   |
| G175-H1 | 54.41±11.21               |                        |                   | 13.05                      | 0.23±0.01             | 13.28                                     | 13.39                                    |

**Table S9.** Spin lock power ( $\omega_{\text{SL}}/2\pi$ ) and offset ( $\Omega/2\pi$ ) used in  $^{15}\text{N}$   $R_{1\rho}$  relaxation dispersion experiments of P5abc.

| Residue                       | $\omega_{\text{SL}}/2\pi$ [Hz] | $\Omega/2\pi$ [Hz]                                      |
|-------------------------------|--------------------------------|---------------------------------------------------------|
| G174-N1<br>G175-N1<br>G164-N1 | 100                            | 500,400,350,300,250,200,175,±150,125,100,±75,50,±25     |
|                               | 150                            | 500,400,350,300,250,200,175,±150,125,100,±75,50,±25     |
|                               | 200                            | 500,400,350,300,250,200,175,±150,125,100,±75,50,±25     |
|                               | 300                            | 700,±500,400,350,±300,250,200,175,150,125,±100,±50      |
| G176-N1                       | 100                            | 500,±400,±300,±200,±100, ±50,-125,-150,-250,-275,-350   |
|                               | 150                            | ±500,±400,±300,±200,±100,±50,-150,-250,-350,-450        |
|                               | 200                            | ±600,±400,±300,±200,±100,±50,-150,-250,-350,-450        |
|                               | 300                            | ±800,±600,±400,±200,±100,±50,-150,-250,-300,-500        |
| U167-N3                       | 100                            | 500,400,350,325,300,250,200,175,150,125,±100,75,±50,±25 |
|                               | 150                            | 500,±400,350,300,250,±200,175,150,125,±100,75,±50       |
|                               | 200                            | 500,±400,350,300,250,±200,175,150,125,±100,75,±50,      |
|                               | 300                            | 700,±500,400,350,±300,250,200,175,150,125,±100,±50      |
